# Supplementary material
Source: PubMed Central journal article supplement (PMC8496690)
Supplement: aim-olf-L210600-L21-0600_Supplement.pdf [file aim-olf-L210600-L21-0600_Supplement.pdf]

## Supplementary Material\*

Kaka AS, MacDonald R, Linskens EJ, et al. Update alert 2: remdesivir for adults with COVID-19. *Ann Intern Med.* 5 October 2021. [Epub ahead of print]. doi:10.7326/L21-0600

*Supplement Figure.* Literature Flow Diagram

*Supplement Table 1.* Study characteristics of the included trials

*Supplement Table 2.* Summary of conclusions and updated findings for randomized trials of remdesivir

*Supplement Table 3.* Effect of remdesivir in randomized controlled studies

*Supplement Table 4.* Study outcomes A

*Supplement Table 5.* Study outcomes B

*Supplement Table 6.* Viral load

*Supplement Table 7.* Harms A (Number of subjects reporting at least one event)

*Supplement Table 8.* Risk of bias of studies

References

\* This supplementary material was provided by the authors to give readers further details on their article. The material was reviewed but not copyedited.

## Supplement Figure. Literature Flow Diagram

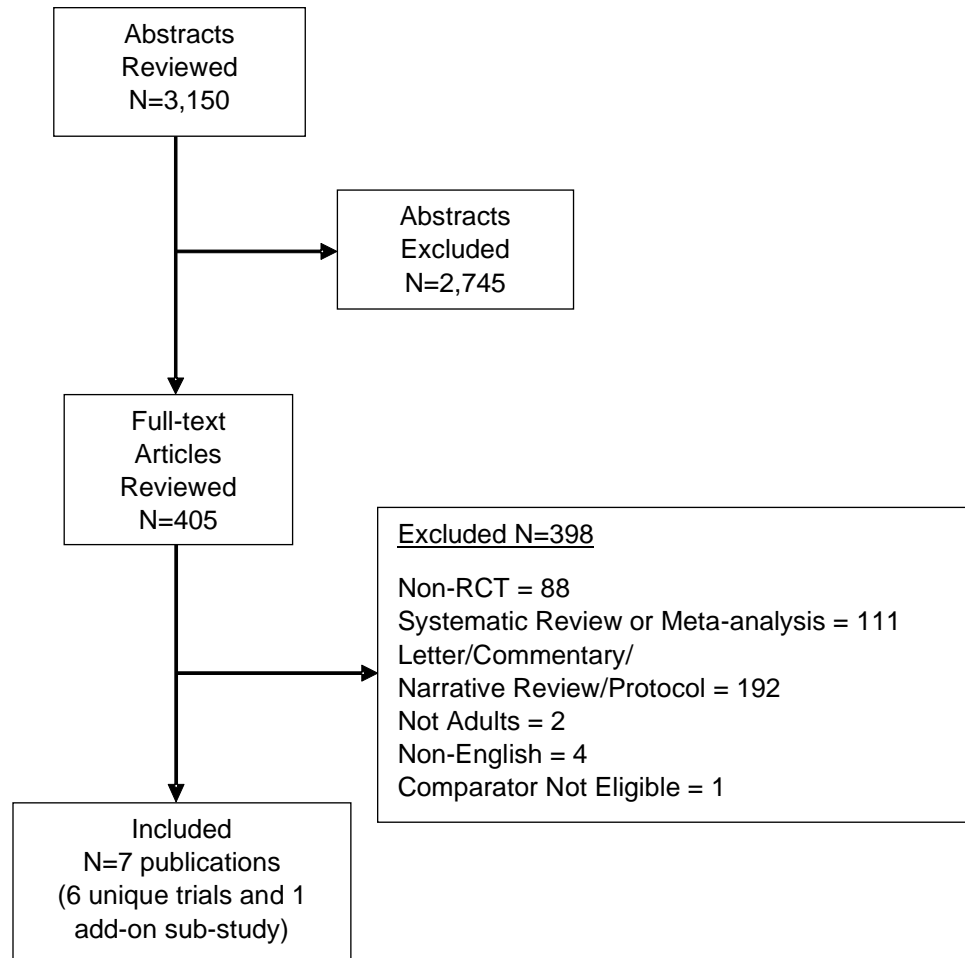

**Supplement Table 1. Study Characteristics of the Included Trials**

| Author, Year Country<br>Funding<br>Risk of Bias                                                                                                                                                                             | Intervention<br>Comparator<br>Inclusion/exclusion criteria<br>Study Period/Length of Follow-up                                                                                                                                                                                                                                                                                                                                                                                                                                                                                                                                                                                                                                                                                                                                                                                                                                                                                                                                                                                                                                                                                                                                                                                                                                                                                                                                                                                                                     | Demographics                                                                                                                                                                                                                                                                                                                                                                                                                                                                                                                                                                               |
|-----------------------------------------------------------------------------------------------------------------------------------------------------------------------------------------------------------------------------|--------------------------------------------------------------------------------------------------------------------------------------------------------------------------------------------------------------------------------------------------------------------------------------------------------------------------------------------------------------------------------------------------------------------------------------------------------------------------------------------------------------------------------------------------------------------------------------------------------------------------------------------------------------------------------------------------------------------------------------------------------------------------------------------------------------------------------------------------------------------------------------------------------------------------------------------------------------------------------------------------------------------------------------------------------------------------------------------------------------------------------------------------------------------------------------------------------------------------------------------------------------------------------------------------------------------------------------------------------------------------------------------------------------------------------------------------------------------------------------------------------------------|--------------------------------------------------------------------------------------------------------------------------------------------------------------------------------------------------------------------------------------------------------------------------------------------------------------------------------------------------------------------------------------------------------------------------------------------------------------------------------------------------------------------------------------------------------------------------------------------|
| <p>Beigel 2020 (1)<br/>Adaptive Covid-19 Treatment Trial (ACTT-1)</p> <p>Multinational (60 sites and 13 subsites, 45 in the US)</p> <p>Design: RCT</p> <p>Funding: Primarily government, other</p> <p>Risk of Bias: Low</p> | <p>Intervention: Remdesivir (n=541) 200 mg on day 1 followed by 100 mg on days 2–10 (or until hospital discharge or death) in single daily infusions</p> <p>Comparator: Placebo (n=521)</p> <p>Inclusion criteria: 18 years or older and meeting one of the following criteria suggestive of lower respiratory tract infection at enrollment: radiographic infiltrates by imaging study, peripheral oxygen saturation (SpO<sub>2</sub>) ≤94% on room air, or requiring supplemental oxygen, mechanical ventilation, or ECMO; no limit to duration of symptoms prior to enrollment; laboratory-confirmed SARS-CoV-2 infection as determined by a positive RT-PCR assay result from any respiratory specimen collected &lt;72 hours prior to randomization (during the study, this criterion was modified due to limitations in testing capacity to also allow a RT-PCR positive specimen that was collected ≥72 hours prior to randomization if the site was unable to obtain a repeat sample and if the participant had progressive disease consistent with ongoing SARS-CoV-2 infection)</p> <p>Exclusion criteria: ALT or AST &gt;5 times the upper limit of the normal range, impaired renal function as determined by calculating an eGFR or need for hemodialysis or hemofiltration, allergy to study product, pregnancy or breast-feeding, and anticipated discharge from hospital or transfer to another hospital within 72 hours of enrollment</p> <p><b>Study Period/Length of Follow-up:</b> 29 days</p> | <p>N=1062</p> <p><b>Age (years, mean):</b> 59</p> <p><b>Gender (male):</b> 64%</p> <p><b>Race/Ethnicity:</b><br/>White 53%<br/>Black/African American 21%<br/>Asian 13%<br/>Latino (of any race) 23%</p> <p><b>Time from symptom onset to randomization</b><br/>Overall, median [IQR] 9 days [6-12]<br/>Remdesivir median [IQR] 9 days [6-12]<br/>Placebo median [IQR] 9 days [7-13]</p> <p><b>Oxygen status on admission:</b><br/>Percent on no oxygen 13%<br/>Percent on supplemental oxygen 41%<br/>Percent on non-invasive ventilation 18%<br/>Percent on invasive ventilation 27%</p> |
| <p>Wang 2020 (2)<br/>China</p> <p>Design: RCT</p> <p>Funding: Government, other</p>                                                                                                                                         | <p>Intervention: Remdesivir (n=158; 2:1 ratio) 200 mg on day 1 followed by 100 mg on days 2–10 in single daily infusions</p> <p>Comparator: Placebo (n=79)</p>                                                                                                                                                                                                                                                                                                                                                                                                                                                                                                                                                                                                                                                                                                                                                                                                                                                                                                                                                                                                                                                                                                                                                                                                                                                                                                                                                     | <p>N=237</p> <p><b>Age (years, median):</b><br/>Remdesivir 66<br/>Placebo 64</p> <p><b>Gender (male):</b><br/>Remdesivir 56%</p>                                                                                                                                                                                                                                                                                                                                                                                                                                                           |

| <b>Author, Year Country</b><br><b>Funding</b><br><b>Risk of Bias</b>                                                                                                                                                                                                                                                           | <b>Intervention</b><br><b>Comparator</b><br><b>Inclusion/exclusion criteria</b><br><b>Study Period/Length of Follow-up</b>                                                                                                                                                                                                                                                                                                                                                                                                                                                                                                                                                                                                                                                                                                    | <b>Demographics</b>                                                                                                                                                                                                                                                                                                                                                                                                                                                                                                                     |
|--------------------------------------------------------------------------------------------------------------------------------------------------------------------------------------------------------------------------------------------------------------------------------------------------------------------------------|-------------------------------------------------------------------------------------------------------------------------------------------------------------------------------------------------------------------------------------------------------------------------------------------------------------------------------------------------------------------------------------------------------------------------------------------------------------------------------------------------------------------------------------------------------------------------------------------------------------------------------------------------------------------------------------------------------------------------------------------------------------------------------------------------------------------------------|-----------------------------------------------------------------------------------------------------------------------------------------------------------------------------------------------------------------------------------------------------------------------------------------------------------------------------------------------------------------------------------------------------------------------------------------------------------------------------------------------------------------------------------------|
| <p>Risk of Bias: Low</p>                                                                                                                                                                                                                                                                                                       | <p>Inclusion criteria: men and non-pregnant women with COVID-19, age at least 18 years, RT-PCR positive for SARS-CoV-2, pneumonia confirmed by chest imaging, oxygen saturation of 94% or lower on room air or a ratio of arterial oxygen partial pressure to fractional inspired oxygen of 300 mm Hg or less, within 12 days of symptom onset</p> <p>Exclusion criteria: pregnancy or breast feeding; hepatic cirrhosis; ALT or AST &gt;5 times the upper limit of the normal range; known severe renal impairment (estimated eGFR&lt;30 mL/min per 1.73 m<sup>2</sup>) or receipt of continuous renal replacement therapy, hemodialysis, or peritoneal dialysis; enrolment into an investigational treatment study for COVID-19 in the 30 days before screening</p> <p><b>Study Period/Length of Follow-up:</b> 28 days</p> | <p>Placebo 65%</p> <p><b>Race:</b> East Asian</p> <p><b>Time from symptom onset to drug</b><br/> Remdesivir median [IQR] 11 days [9-12]<br/> Placebo median [IQR] 10 days [9-12]</p> <p><b>Oxygen status on admission:</b><br/> Percent on no oxygen<br/> Remdesivir 0%<br/> Placebo 4%</p> <p>Percent on supplemental O<sub>2</sub><br/> Remdesivir 82%<br/> Placebo 83%</p> <p>Percent on non-invasive ventilation<br/> Remdesivir 18%<br/> Placebo 12%</p> <p>Percent on invasive ventilation<br/> Remdesivir 0%<br/> Placebo 1%</p> |
| <p>Goldman 2020 (3)<br/> GS-US-540-5773<br/> SIMPLE 1<br/> 55 hospitals around the world, including sites in the US, Italy, Spain, Germany, Hong Kong, Singapore, South Korea, and Taiwan.<br/> Design: Randomized, open-label, multi-center Phase 3 clinical trial</p> <p>Funding: Industry</p> <p>Risk of Bias: Moderate</p> | <p>Intervention 1: Remdesivir, 5-day course (n=200) 200 mg on day 1 followed by 100 mg on days 2–5 in single daily infusions</p> <p>Intervention 2: Remdesivir, 10-day course (n=197) 200 mg on day 1 followed by 100 mg on days 2–10 in single daily infusions</p> <p>Inclusion criteria: patients ≥ 18 years (at all sites), or aged ≥ 12 and &lt; 18 years of age weighing ≥ 40 kg (where permitted according to local law) currently hospitalized with SARS-CoV-2 infection confirmed by PCR test ≤ 4 days before randomization; radiographic evidence of pulmonary infiltrates and peripheral capillary oxygen saturation (SpO<sub>2</sub>) ≤ 94% or requiring supplemental oxygen at screening</p>                                                                                                                      | <p>N=397</p> <p><b>Age (years, median):</b><br/> 5-day group 61<br/> 10-day group 62</p> <p><b>Gender (male):</b><br/> 5-day group 60%<br/> 10-day group 68%</p> <p><b>Race:</b><br/> White 70%<br/> Black 11%<br/> Asian 11%<br/> Other 7%</p> <p><b>Time from symptom onset to drug</b></p>                                                                                                                                                                                                                                           |

| Author, Year Country<br>Funding<br>Risk of Bias                                                                                                                                                                                                                                                                                                      | Intervention<br>Comparator<br>Inclusion/exclusion criteria<br>Study Period/Length of Follow-up                                                                                                                                                                                                                                                                                                                                                                                                                                                                                                                                                                                                                                                                                                                                                                                                                                                                                                                                                                                                                                                                                                                          | Demographics                                                                                                                                                                                                                                                                                                                                                                                                                                                                                                                                                                                                                             |
|------------------------------------------------------------------------------------------------------------------------------------------------------------------------------------------------------------------------------------------------------------------------------------------------------------------------------------------------------|-------------------------------------------------------------------------------------------------------------------------------------------------------------------------------------------------------------------------------------------------------------------------------------------------------------------------------------------------------------------------------------------------------------------------------------------------------------------------------------------------------------------------------------------------------------------------------------------------------------------------------------------------------------------------------------------------------------------------------------------------------------------------------------------------------------------------------------------------------------------------------------------------------------------------------------------------------------------------------------------------------------------------------------------------------------------------------------------------------------------------------------------------------------------------------------------------------------------------|------------------------------------------------------------------------------------------------------------------------------------------------------------------------------------------------------------------------------------------------------------------------------------------------------------------------------------------------------------------------------------------------------------------------------------------------------------------------------------------------------------------------------------------------------------------------------------------------------------------------------------------|
|                                                                                                                                                                                                                                                                                                                                                      | <p>Exclusion criteria: Pregnant or women who were breast feeding infants, ALT or AST &gt;5 times the upper limit of the normal range, creatinine clearance &lt; 50 mL/min using the Cockcroft-Gault formula for participants ≥ 18 years of age and Schwartz Formula for participants &lt; 18 years of age; mechanically ventilated (including V-V ECMO) ≥ 5 days, or any duration of V-A ECMO; evidence of multiorgan failure; concurrent treatment with other agents with actual or possible direct acting antiviral activity against SARS-CoV-2 &lt; 24 hours prior to study drug dosing; participant in any other clinical trial of an experimental treatment for COVID-19</p> <p><b>Study Period/Length of Follow-up:</b> 14 days (up to 30 days for adverse events)</p>                                                                                                                                                                                                                                                                                                                                                                                                                                            | <p>Remdesivir 5-day median [IQR] 8 days [5-11]<br/>Remdesivir 10-day median [IQR] 9 days [6-12]</p> <p><b>Oxygen status on admission:</b><br/>Percent on no oxygen 14%<br/>Percent on supplemental oxygen 55%<br/>Percent on non-invasive ventilation 27%<br/>Percent on invasive ventilation 4%</p>                                                                                                                                                                                                                                                                                                                                     |
| <p>Spinner 2020 (4)<br/>GS-US-540-5774<br/>SIMPLE 2</p> <p>105 sites in the US, France, Germany, Hong Kong, Italy, Republic of Korea, The Netherlands, Singapore, Spain, Switzerland, Taiwan and the United Kingdom</p> <p>Design: Randomized, open-label, multi-center Phase 3 clinical trial</p> <p>Funding: Industry</p> <p>Risk of Bias: Low</p> | <p>Intervention 1: Remdesivir, 5-day course (n=199) 200 mg on day 1 followed by 100 mg on days 2–5 in single daily infusions</p> <p>Intervention 2: Remdesivir, 10-day course (n=197) 200 mg on day 1 followed by 100 mg on days 2–10 in single daily infusions</p> <p>Comparator: Standard care (n=200)</p> <p>Inclusion criteria: ≥ 18 years (at all sites), or aged ≥ 12 and &lt; 18 years of age weighing ≥ 40 kg (where permitted according to local law and approved by relevant review boards) currently hospitalized and requiring medical care for COVID-19; SARS-CoV-2 infection confirmed by PCR test ≤ 4 days before randomization; moderate COVID-19 pneumonia (peripheral capillary oxygen saturation (SpO<sub>2</sub>) &gt;94% on room air radiographic evidence of pulmonary infiltrates)</p> <p>Exclusion criteria: Women who were pregnant or breast feeding infants, ALT or AST &gt;5 times the upper limit of the normal range; creatinine clearance &lt; 50 mL/min using the Cockcroft-Gault formula for participants ≥ 18 years of age and Schwartz Formula for participants &lt; 18 years of age; mechanically ventilated at screening; concurrent treatment or planned concurrent treatment</p> | <p><b>N=596 randomized (584 analyzed)</b></p> <p><b>Age (years, median):</b><br/>5-day group 58<br/>10-day group 56<br/>Standard care 57</p> <p><b>Gender (male):</b> 61%</p> <p><b>Race:</b><br/>White 58%<br/>Black 18%<br/>Asian 18%<br/>Other 7%<br/>Latino (of any race) 18%</p> <p><b>Time from symptom onset to drug</b><br/>Remdesivir 5-day median [IQR] 8 days [5-11]<br/>Remdesivir 10-day median [IQR] 8 days [5-11]</p> <p><b>Oxygen status on admission:</b><br/>Percent on no oxygen: 84%<br/>Percent on supplemental oxygen: 15%<br/>Percent on non-invasive ventilation: NA<br/>Percent on invasive ventilation: NA</p> |

| Author, Year Country<br>Funding<br>Risk of Bias                                                                                                                                                                                                    | Intervention<br>Comparator<br>Inclusion/exclusion criteria<br>Study Period/Length of Follow-up                                                                                                                                                                                                                                                                                                                                                                                                                                                                                                                                                          | Demographics                                                                                                                                                                                                                                                                                                                                                                                                                                                                           |
|----------------------------------------------------------------------------------------------------------------------------------------------------------------------------------------------------------------------------------------------------|---------------------------------------------------------------------------------------------------------------------------------------------------------------------------------------------------------------------------------------------------------------------------------------------------------------------------------------------------------------------------------------------------------------------------------------------------------------------------------------------------------------------------------------------------------------------------------------------------------------------------------------------------------|----------------------------------------------------------------------------------------------------------------------------------------------------------------------------------------------------------------------------------------------------------------------------------------------------------------------------------------------------------------------------------------------------------------------------------------------------------------------------------------|
|                                                                                                                                                                                                                                                    | <p>with other agents with actual or possible direct acting antiviral activity against SARS-CoV-2; participation in any other clinical trial of an experimental treatment for COVID-19</p> <p><b>Study Period/Length of Follow-up:</b> 11 days (primary outcome); final assessment on day 28</p>                                                                                                                                                                                                                                                                                                                                                         |                                                                                                                                                                                                                                                                                                                                                                                                                                                                                        |
| <p>WHO Solidarity 2020 (5)</p> <p>30 countries: Europe (13), Canada, Latin America (5), Asia (9), Africa (2)</p> <p>Design: Open-label randomized trial</p> <p>Funding: No funders for main Solidarity trial</p> <p>Risk of Bias: Moderate</p>     | <p>Intervention: Remdesivir, intravenous, (n=2750), 200 mg on day 0 followed by 100 mg on days 1-9 (treatment stopped at discharge or death)</p> <p>Comparator: No study drug (local standard of care) (n=2725)</p> <p>Inclusion criteria: ≥ 18 years, hospitalized with a diagnosis of COVID-19, not known to have received any study drug, without anticipated transfer elsewhere within 72 hours, no contraindication to any study drug (physician's view)</p> <p>Exclusion criteria: none reported</p> <p><b>Study Period/Length of Follow-up:</b> 28 days (Note: mortality only during initial hospitalization; follow-up ceased at discharge)</p> | <p><b>N=5475 randomized (5451 analyzed)</b></p> <p><b>Age (years):</b><br/> &lt;50: 35%<br/> 50-69: 47%<br/> 70+: 18%</p> <p><b>Gender (male):</b> 63%</p> <p><b>Race:</b> NR</p> <p><b>Geographic Location</b><br/> Europe or Canada: 26%<br/> Latin America: 18%<br/> Asia or Africa: 56%</p> <p><b>Time from symptom onset to drug:</b> NR</p> <p><b>Oxygen status on admission:</b><br/> Percent on no oxygen: 24%<br/> Percent on oxygen: 67%<br/> Percent on ventilation: 9%</p> |
| <p><b>NOR-Solidarity 2021 (6) *</b><br/><i>Sub-study of WHO Solidarity</i></p> <p>Norway</p> <p><i>Design: Open-label randomized trial</i></p> <p><i>Funding: National Clinical Therapy Research in the Specialist Health Services, Norway</i></p> | <p><b>Intervention: Remdesivir, intravenous, (n=43), 200 mg on day 0 followed by 100 mg on days 1-9 (treatment stopped at discharge or death)</b></p> <p><b>Comparator: No study drug (local standard of care) (n=58 allocated versus remdesivir, 87 total in full analysis set).</b></p> <p><b>Inclusion criteria: (see WHO Solidarity)</b></p> <p><b>Exclusion criteria: severe comorbid conditions with life expectancy &lt;3 months, level of aspartate</b></p>                                                                                                                                                                                     | <p><b>N=101 randomized (83 completed 3-month follow-up).</b></p> <p><b>Age (years):</b> 59</p> <p><b>Gender (male):</b> 73%</p> <p><b>Race:</b> NR</p> <p><b>Time from symptom onset to drug: mean 7 days</b></p> <p><b>Oxygen status on admission: NR</b></p> <p><b>Patients with respiratory failure (Po<sub>2</sub>-Fio<sub>2</sub> &lt;40 kPa): 44%</b></p>                                                                                                                        |

| Author, Year Country<br>Funding<br>Risk of Bias                                                                          | Intervention<br>Comparator<br>Inclusion/exclusion criteria<br>Study Period/Length of Follow-up                                                                                                                                                                                                                                                                                                                                                                                                                                                                                                                                                                                       | Demographics                                                                                                                                                                                                                                                                                                                                                                                                     |
|--------------------------------------------------------------------------------------------------------------------------|--------------------------------------------------------------------------------------------------------------------------------------------------------------------------------------------------------------------------------------------------------------------------------------------------------------------------------------------------------------------------------------------------------------------------------------------------------------------------------------------------------------------------------------------------------------------------------------------------------------------------------------------------------------------------------------|------------------------------------------------------------------------------------------------------------------------------------------------------------------------------------------------------------------------------------------------------------------------------------------------------------------------------------------------------------------------------------------------------------------|
|                                                                                                                          | <p><b><i>aminotransferase or ALT &gt; 5 times the upper limit of normal, rate-corrected QT interval greater &gt;470 ms, pregnancy, breastfeeding, acute occurrence of a comorbid condition in a 7-day period before inclusion, known intolerance to study drugs, participation in a potentially confounding trial, or concomitant medications interfering with the study drugs.</i></b></p>                                                                                                                                                                                                                                                                                          |                                                                                                                                                                                                                                                                                                                                                                                                                  |
| <p>Mahajan 2021 (7)<br/>India<br/>Design: Open-label randomized trial<br/>Funding: No funders<br/>Risk of Bias: High</p> | <p>Intervention: Remdesivir, intravenous, (n=41) 200 mg on day 1 followed by 100 mg once daily on days 2-5. Both treatment groups continued supportive therapy</p> <p>Comparator: No study drug (local standard of care) (n=41)</p> <p>Inclusion criteria: 18 to 60 years of age hospitalized with a diagnosis of COVID-19 by PCR, radiographic evidence of pneumonia, respiratory rate &gt;24/min, oxygen saturation ≤94%, creatine clearance &gt;40 mL/min</p> <p>Exclusion criteria: receiving mechanical ventilation, multi organ failure, AST/ALT &gt;3 times the upper limit of normal</p> <p><b>Study Period/Length of Follow-up:</b> 24 days or until discharge or death</p> | <p><b>N=82 randomized (70 analyzed)</b><br/><b>Age (years): 58</b><br/><b>Gender (male): 66%</b><br/><b>Race: NR</b></p> <p><b>Time from symptom onset to drug:</b> mean 7 days</p> <p><b>Oxygen status on admission:</b><br/>Percent on no oxygen: 0%<br/>Percent on low-flow oxygen: 76%<br/>Percent on high-flow oxygen /non-invasive ventilation: 24%<br/>Percent on invasive mechanical ventilation: 0%</p> |

ALT = alanine aminotransferase; AST = aspartate aminotransferase; ECMO = extracorporeal membrane oxygenation; eGFR = estimated glomerular filtration rate; IQR = interquartile range; RT-PCR = reverse transcription, polymerase-chain-reaction; SARS-CoV = Severe Acute Respiratory Syndrome Coronavirus-2 infection

\* Indicates newly identified sub-study

**Supplement Table 2. Summary of Conclusions and Updated Findings for Randomized Trials of Remdesivir**

| Comparison                                                                                                                            | Outcome                                              | Conclusions from Last Report Version                                                                                                                                                                                                                                                                                                                                                                                                                                                                                                                                                                           | New Trial Results/Analyses                                                                                                                        | Updated Conclusions      |
|---------------------------------------------------------------------------------------------------------------------------------------|------------------------------------------------------|----------------------------------------------------------------------------------------------------------------------------------------------------------------------------------------------------------------------------------------------------------------------------------------------------------------------------------------------------------------------------------------------------------------------------------------------------------------------------------------------------------------------------------------------------------------------------------------------------------------|---------------------------------------------------------------------------------------------------------------------------------------------------|--------------------------|
| <b>Remdesivir 10-day course versus control (placebo or SC) for any severity of COVID-19 4 trials (n=7171 randomized) (1, 2, 4, 5)</b> | Mortality                                            | <p>Remdesivir 10-day course probably results in little to no difference versus control (1, 2, 4, 5)</p> <p><i>Subgroup analyses (post-hoc), based on initial respiratory support:</i></p> <ul style="list-style-type: none"> <li>• <i>Not requiring supplemental O<sub>2</sub>; may result in little to no difference versus control (1, 4, 5)</i></li> <li>• <i>Requiring supplemental O<sub>2</sub> but not ventilated; may result in a moderate reduction versus control (1, 2, 5)</i></li> <li>• <i>Requiring ventilation/ECMO*; may result in a moderate increase versus control (1, 2, 5)</i></li> </ul> | <p><b>Results from one small sub-study of WHO Solidarity found 28-day and 60-day mortality did not differ between remdesivir and SC (6) §</b></p> | No change in conclusions |
|                                                                                                                                       | Proportion recovered†                                | <p>Remdesivir 10-day course probably results in a moderate increase in percent recovered versus control (1, 2, 4)</p>                                                                                                                                                                                                                                                                                                                                                                                                                                                                                          | No new evidence                                                                                                                                   | No change in conclusions |
|                                                                                                                                       | Proportion with clinical improvement‡                | <p>Remdesivir 10-day course may result in a moderate increase in percent with clinical improvement versus control (2, 4)</p>                                                                                                                                                                                                                                                                                                                                                                                                                                                                                   | No new evidence                                                                                                                                   | No change in conclusions |
|                                                                                                                                       | Hospital length of stay                              | No pooled analysis                                                                                                                                                                                                                                                                                                                                                                                                                                                                                                                                                                                             | No new evidence                                                                                                                                   | No change in conclusions |
|                                                                                                                                       | Time to recovery/                                    | Remdesivir 10-day course may result in up to a large reduction in median time to recovery or a moderate reduction in time to clinical improvement versus control (1, 2, 4)                                                                                                                                                                                                                                                                                                                                                                                                                                     | No new evidence                                                                                                                                   | No change in conclusions |
|                                                                                                                                       | Clinical improvement                                 |                                                                                                                                                                                                                                                                                                                                                                                                                                                                                                                                                                                                                |                                                                                                                                                   |                          |
|                                                                                                                                       | Proportion on invasive ventilation/ECMO at follow-up | Remdesivir 10-day course may result in a small reduction versus control (1, 2, 4)                                                                                                                                                                                                                                                                                                                                                                                                                                                                                                                              | No new evidence                                                                                                                                   | No change in conclusions |
|                                                                                                                                       | Proportion with new need for ventilation             | Remdesivir 10-day course probably results in little to no difference versus control (5)                                                                                                                                                                                                                                                                                                                                                                                                                                                                                                                        | <p><b>Results from one small sub-study of WHO Solidarity found no</b></p>                                                                         | No change in conclusions |



| Comparison                                                                                                | Outcome                                              | Conclusions from Last Report Version                                                                                                                                                                                                                                                  | New Trial Results/Analyses                                                                                                                       | Updated Conclusions      |
|-----------------------------------------------------------------------------------------------------------|------------------------------------------------------|---------------------------------------------------------------------------------------------------------------------------------------------------------------------------------------------------------------------------------------------------------------------------------------|--------------------------------------------------------------------------------------------------------------------------------------------------|--------------------------|
|                                                                                                           | Serious adverse events                               | Remdesivir 10-day course probably results in a moderate reduction versus control (1, 2, 4)                                                                                                                                                                                            | <i>differences between groups. (6) §</i><br><b>Results from one small sub-study of WHO Solidarity found no differences between groups. (6) §</b> | No change in conclusions |
| <b>Remdesivir 10-day course versus placebo 2 trials, any severity COVID-19 (n=1299 randomized) (1, 2)</b> | Mortality                                            | Remdesivir 10-day course may result in a small reduction versus placebo (1, 2)                                                                                                                                                                                                        | No new evidence                                                                                                                                  | No change in conclusions |
|                                                                                                           | Proportion recovered†                                | Remdesivir 10-day course probably results in a moderate increase versus placebo (1, 2)                                                                                                                                                                                                | No new evidence                                                                                                                                  | No change in conclusions |
|                                                                                                           | Proportion with clinical improvement‡                | Remdesivir 10-day course may result in a moderate increase versus placebo (2)                                                                                                                                                                                                         | No new evidence                                                                                                                                  | No change in conclusions |
|                                                                                                           | Hospital length of stay                              | Remdesivir 10-day course may result in a moderate reduction versus placebo (1, 2)                                                                                                                                                                                                     | No new evidence                                                                                                                                  | No change in conclusions |
|                                                                                                           | Time to recovery or clinical improvement             | Remdesivir 10-day course may result in a moderate to large reduction versus placebo (1, 2)<br><i>Subgroup analyses (prespecified): (1)</i><br>• Time to recovery did not vary by age, gender, symptom duration (≤10 days vs >10 days) or disease severity (mild/ moderate, or severe) | No new evidence                                                                                                                                  | No change in conclusions |
|                                                                                                           | Proportion on invasive ventilation/ECMO at follow-up | Remdesivir 10-day course may result in a moderate reduction versus placebo (1, 2)                                                                                                                                                                                                     | No new evidence                                                                                                                                  | No change in conclusions |
|                                                                                                           | Serious adverse events                               | Remdesivir 10-day course probably results in a moderate reduction versus placebo (1, 2)                                                                                                                                                                                               | No new evidence                                                                                                                                  | No change in conclusions |
| <b>Remdesivir 10-day course versus SC, any severity COVID-19</b>                                          | Mortality                                            | Remdesivir 10-day course probably results in little to no difference versus SC (4, 5)                                                                                                                                                                                                 | <b>Results from one small sub-study of WHO Solidarity found 28-day and 60-day mortality did not differ between groups (6) §</b>                  | No change in conclusions |

| Comparison                                                                                                 | Outcome                                              | Conclusions from Last Report Version                                                                                                                     | New Trial Results/Analyses                                                                           | Updated Conclusions      |
|------------------------------------------------------------------------------------------------------------|------------------------------------------------------|----------------------------------------------------------------------------------------------------------------------------------------------------------|------------------------------------------------------------------------------------------------------|--------------------------|
| <b>2 trials (n=5872 randomized) (4, 5)</b>                                                                 | Proportion recovered†                                | Remdesivir 10-day course may result in a moderate increase in percent recovered versus SC (4)                                                            | No new evidence                                                                                      | No change in conclusions |
|                                                                                                            | Proportion with clinical improvement‡                | Remdesivir 10-day course may result in a moderate increase in percent recovered versus SC (4)                                                            | No new evidence                                                                                      | No change in conclusions |
|                                                                                                            | Hospital length of stay                              | The percentage of individuals hospitalized at days 7-14 did not differ between the remdesivir 10-day course and SC groups (4, 5)<br>Insufficient CoE (4) | No new evidence                                                                                      | No change in conclusions |
|                                                                                                            | Time to recovery or clinical improvement             | Insufficient CoE (4)                                                                                                                                     |                                                                                                      |                          |
|                                                                                                            | Proportion on invasive ventilation/ECMO at follow-up | Remdesivir 10-day course may result in a small reduction versus SC (4)                                                                                   | No new evidence                                                                                      | No change in conclusions |
|                                                                                                            | Proportion with new need for ventilation             | Remdesivir 10-day course probably results in little to no difference versus control (5)                                                                  | <b>Results from one small sub-study of WHO Solidarity found no differences between groups. (6) §</b> | No change in conclusions |
|                                                                                                            | Serious adverse events                               | Remdesivir 10-day course may result in a small reduction versus SC (4)                                                                                   | <b>Results from one small sub-study of WHO Solidarity found no differences between groups. (6) §</b> | No change in conclusions |
| <b>Remdesivir 5-day course versus SC 2 trials (n=481 randomized), moderate (4) and severe COVID-19 (7)</b> | Mortality                                            | Remdesivir 5-day course may result in a small reduction versus SC (4, 7)                                                                                 | No new evidence                                                                                      | No change in conclusions |
|                                                                                                            | Proportion recovered†                                | Remdesivir 5-day course may result in a moderate increase versus SC (4)                                                                                  | No new evidence                                                                                      | No change in conclusions |
|                                                                                                            | Proportion with clinical improvement‡                | Remdesivir 5-day course may result in a moderate increase versus SC (4)                                                                                  | No new evidence                                                                                      | No change in conclusions |
|                                                                                                            | Hospital length of stay                              | The percentage of individuals hospitalized at day 11 and 14 did not differ between the remdesivir 5-day and SC groups (4)                                | No new evidence                                                                                      | No change in conclusions |
|                                                                                                            | Time to recovery or clinical improvement             | Remdesivir 5-day course may result in a small reduction versus SC (4, 7)                                                                                 | No new evidence                                                                                      | No change in conclusions |
|                                                                                                            | Proportion on invasive ventilation/ECMO at follow-up | Remdesivir 5-day course may result in a small reduction versus SC (4)                                                                                    | No new evidence                                                                                      | No change in conclusions |

| Comparison                                                                                                                                                    | Outcome                                              | Conclusions from Last Report Version                                                                                                 | New Trial Results/Analyses | Updated Conclusions      |
|---------------------------------------------------------------------------------------------------------------------------------------------------------------|------------------------------------------------------|--------------------------------------------------------------------------------------------------------------------------------------|----------------------------|--------------------------|
|                                                                                                                                                               | Proportion with new need for ventilation             | Insufficient CoE, based on 1 RCT (7) assessed as high risk of bias                                                                   | No new evidence            |                          |
|                                                                                                                                                               | Serious adverse events                               | Remdesivir 5-day course may result in a small reduction versus SC (4)                                                                | No new evidence            | No change in conclusions |
| <b>Remdesivir 5-day course versus Remdesivir 10-day course, moderate (4) and severe (3) COVID-19 (excludes critical COVID-19) 2 trials (n=798 randomized)</b> | Mortality                                            | Remdesivir 5-day course may result in a small reduction versus 10-day course (3, 4)                                                  | No new evidence            | No change in conclusions |
|                                                                                                                                                               | Proportion recovered†                                | Remdesivir 5-day course may result in a moderate increase versus 10-day course (3, 4)                                                | No new evidence            | No change in conclusions |
|                                                                                                                                                               | Proportion with clinical improvement‡                | Remdesivir 5-day course may result in a moderate increase versus 10-day course (3, 4)                                                | No new evidence            | No change in conclusions |
|                                                                                                                                                               | Hospital length of stay                              | The percentage of individuals hospitalized at day 11 and 14 did not differ between the remdesivir 5-day and 10-day course groups (4) | No new evidence            | No change in conclusions |
|                                                                                                                                                               | Time to recovery or clinical improvement             | Remdesivir 5-day course may result in a small reduction versus 10-day course (3, 4)                                                  | No new evidence            | No change in conclusions |
|                                                                                                                                                               | Proportion on invasive ventilation/ECMO at follow-up | Remdesivir 5-day course may result in a small reduction versus 10-day course (3, 4)                                                  | No new evidence            | No change in conclusions |
|                                                                                                                                                               | Serious adverse events                               | Remdesivir 5-day course may result in a moderate reduction versus 10-day course (3, 4)                                               | No new evidence            | No change in conclusions |

#### Abbreviations

COE=certainty of evidence; ECMO=extracorporeal membrane oxygenation; NR=not reported; SC=standard of care

\* Includes some patients receiving Hi-flow oxygen and non-invasive ventilation

† Recovery was defined as discharge from the hospital or hospitalization for infection control purposes only (1) or discharge from the hospital or hospitalized but not requiring supplemental oxygen or ongoing medical care (2-4) ]

‡ Clinical improvement was defined as a two-point reduction in patients' admission status on a 6-point ordinal scale (1= live discharge to 6=death), or live discharge from the hospital, whichever came first (2) or as an improvement of at least 2 points from baseline on 7-point ordinal scale (1=death to 7=discharged from hospital) (3, 4)].

§ Indicates findings from newly identified sub-study

**Supplement Table 3. Effect of Remdesivir in Randomized Controlled Studies**

| Comparison(s);<br>Number of trials<br>(number<br>evaluated)                                        | Study, Year<br>(reference);<br>Assessment<br>timepoint;<br>Disease severity,<br>based on oxygen (O <sub>2</sub> )<br>status at admission                                                                                                              | Absolute effect of Remdesivir<br>versus Control (95% CI)                                                                       | Certainty<br>of Evidence | Summary                                                                                                                                 |
|----------------------------------------------------------------------------------------------------|-------------------------------------------------------------------------------------------------------------------------------------------------------------------------------------------------------------------------------------------------------|--------------------------------------------------------------------------------------------------------------------------------|--------------------------|-----------------------------------------------------------------------------------------------------------------------------------------|
| <b>All-cause Mortality</b>                                                                         |                                                                                                                                                                                                                                                       |                                                                                                                                |                          |                                                                                                                                         |
| <b>Remdesivir 10-day course versus placebo or standard of care;</b> 4 trials (n=7142) (1, 2, 4, 5) | 11-29 days<br>Any severity - No O <sub>2</sub> at baseline 25%; Receiving O <sub>2</sub> or ventilation (non-invasive and invasive) at baseline 75%                                                                                                   | 10.6% (384/3635) vs. 11.2% (394/3507)<br>Pooled ARD -0.8 (-2.2 to 0.7)                                                         | Moderate ‡               | Remdesivir 10-day course probably results in little to no difference in mortality versus placebo or standard care                       |
| <b>Remdesivir 10-day course versus placebo;</b> 2 trials (n=1298)                                  | Beigel (ACTT-1) 2020 (1); 29 days<br>Severe - No O <sub>2</sub> 13%<br>Wang 2020 (2); 28 days<br>Severe - No O <sub>2</sub> 1%                                                                                                                        | 10.9% (59/541) vs. 14.8% (77/521)<br>ARD -3.9% (-7.9 to 0.1)<br>13.9% (22/158) vs. 12.8% (10/78)<br>ARD 1.1% (-8.1 to 10.3)    | Low §                    | Remdesivir 10-day course may result in a small reduction in mortality versus placebo;<br>Range of ARDs -3.9% to 1.1%                    |
| <b>Remdesivir 10-day course versus standard of care;</b> 2 trials (n=5844)                         | Spinner (GS-US-540-5774: SIMPLE-2) 2020 (4); 11 days<br>Moderate - No O <sub>2</sub> 84%<br>Solidarity 2020 (5) ; 28 days ( <i>reported only during initial hospitalization; follow-up ceased after discharge</i> )<br>Severe - No O <sub>2</sub> 24% | 1.0% (2/193) vs. 2.0% (4/200)<br>ARD-1.0% (-3.4 to 1.4)<br><br>11.0% (301/2743) vs. 11.2% (303/2708)<br>ARD -0.2 (-1.9 to 1.5) | Moderate ‡               | Remdesivir 10-day course probably results in little to no difference on mortality versus standard care;<br>Range of ARDs -1.0% to -0.2% |
| <b>Remdesivir 5-day course versus standard of care;</b> 2 trials (n=461)                           | Spinner (GS-US-540-5774: SIMPLE-2) 2020 (4); 11 days<br>Moderate - No O <sub>2</sub> 82%                                                                                                                                                              | 0% (0/191) vs. 2.0% (4/200)<br>ARD -2.0% (-4.2 to 0.2)                                                                         | Low ¶                    | Remdesivir 5-day course may result in a small reduction versus SC                                                                       |

| Comparison(s);<br>Number of trials<br>(number<br>evaluated)                                                                                                                                                                                                   | Study, Year<br>(reference);<br>Assessment<br>timepoint;<br>Disease severity,<br>based on oxygen (O <sub>2</sub> )<br>status at admission                                                                                                              | Absolute effect of Remdesivir<br>versus Control (95% CI)                                                                                                                                                            | Certainty<br>of Evidence                     | Summary                                                                                                                                                                                                                                                                       |
|---------------------------------------------------------------------------------------------------------------------------------------------------------------------------------------------------------------------------------------------------------------|-------------------------------------------------------------------------------------------------------------------------------------------------------------------------------------------------------------------------------------------------------|---------------------------------------------------------------------------------------------------------------------------------------------------------------------------------------------------------------------|----------------------------------------------|-------------------------------------------------------------------------------------------------------------------------------------------------------------------------------------------------------------------------------------------------------------------------------|
| <b>Remdesivir 5-day course versus Remdesivir 10-day course;</b><br>2 trials (n=781)                                                                                                                                                                           | Mahajan 2021 (7) ; 24 days<br>Severe - No O <sub>2</sub> 0%<br>Goldman (GS-US-540-5773: SIMPLE-1) 2020 (3); 14 days<br>Severe - No O <sub>2</sub> 14%<br>Spinner (GS-US-540-5774: SIMPLE-2) 2020 (4); 11 days<br><br>Moderate - No O <sub>2</sub> 86% | Per protocol (day 12 to 24)<br>14.7% (5/34) vs. 8.3% (3/36)<br>ARD 6.4% (-8.6 to 21.3)<br>8.0% (16/200) vs. 10.7% (21/197)<br>ARD -2.7% (-8.4 to 3.1)<br><br>0% (0/191) vs. 1.0% (2/193)<br>ARD -1.0% (-2.8 to 0.7) | Low ††                                       | Remdesivir 5-day course of may result in a small reduction in mortality versus 10-day course; Range of ARDs -2.7% to -1.0%                                                                                                                                                    |
| <b>Proportion of patients recovered, defined as discharge from the hospital or hospitalization for infection control purposes only (1) or discharge from the hospital or hospitalized but not requiring supplemental oxygen or ongoing medical care (2-4)</b> |                                                                                                                                                                                                                                                       |                                                                                                                                                                                                                     |                                              |                                                                                                                                                                                                                                                                               |
| <b>Remdesivir 10-day course versus placebo or standard of care;</b><br>3 trials (n=1682) (1, 2, 4)<br><br><b>Remdesivir 10-day course versus placebo;</b><br>2 trials (n=1289)                                                                                | 28-29 days<br>Any severity - No O <sub>2</sub> 28%, Any O <sub>2</sub> /Ventilation 72%<br><br>Beigel (ACTT-1) 2020 (1); 29 days<br>Severe - No O <sub>2</sub> 13%<br>Wang 2020 (2); 28 days<br>Severe - No O <sub>2</sub> 1%                         | 77.3% (683/884) vs. 71.6% (571/798)<br>Pooled ARD 6.5% (2.4 to 10.7)<br><br>73.8% (399/541) vs. 67.6% (352/521)<br>ARD 6.2% (0.7 to 11.7)<br>70.7% (106/150) vs. 63.6% (49/77)<br>ARD 7.0% (-6.0 to 20.0)           | Moderate ‡<br><br><br><br><br><br>Moderate ‡ | Remdesivir 10-day course probably results in a moderate increase in percent recovered versus placebo or standard care<br><br><br><br><br><br>Remdesivir 10-day course probably results in a moderate increase in percent recovered versus placebo; Range of ARDs 6.2% to 7.0% |

| Comparison(s);<br>Number of trials<br>(number<br>evaluated)                                                                                                                                                                                                                                                                                       | Study, Year<br>(reference);<br>Assessment<br>timepoint;<br>Disease severity,<br>based on oxygen (O <sub>2</sub> )<br>status at admission                                             | Absolute effect of Remdesivir<br>versus Control (95% CI)                                                                                           | Certainty<br>of Evidence | Summary                                                                                                                                                                                                         |
|---------------------------------------------------------------------------------------------------------------------------------------------------------------------------------------------------------------------------------------------------------------------------------------------------------------------------------------------------|--------------------------------------------------------------------------------------------------------------------------------------------------------------------------------------|----------------------------------------------------------------------------------------------------------------------------------------------------|--------------------------|-----------------------------------------------------------------------------------------------------------------------------------------------------------------------------------------------------------------|
| <b>Remdesivir 10-day course versus standard of care;</b><br>1 trial (n=393)<br><b>Remdesivir 5-day course versus standard of care;</b><br>1 trial (n=391)                                                                                                                                                                                         | Spinner (GS-US-540-5774: SIMPLE-2) 2020 (4); 28 days<br>Moderate - No O <sub>2</sub> 84%<br>Spinner (GS-US-540-5774: SIMPLE-2) 2020 (4); 28 days<br>Moderate - No O <sub>2</sub> 82% | 92.2% (178/193) vs. 85% (170/200)<br>ARD 7.2% (1.0 to 13.5)<br><br>91.6% (175/191) vs. 85% (170/200)<br>ARD 6.6% (0.3 to 12.9)                     | Low §<br><br><br>Low §   | Remdesivir 10-day course may result in a moderate increase in percent recovered versus standard care<br><br>Remdesivir 5-day course may result in a moderate increase in percent recovered versus standard care |
| <b>Remdesivir 5-day course versus Remdesivir 10-day course;</b><br>2 trials (n=781)                                                                                                                                                                                                                                                               | Goldman (GS-US-540-5773: SIMPLE-1) 2020 (3); 14 days<br>Severe - No O <sub>2</sub> 14%<br>Spinner (GS-US-540-5774: SIMPLE-2) 2020 (4); 11 days<br>Moderate - No O <sub>2</sub> 86%   | 64.5% (129/200) vs. 53.8% (106/197)<br>Baseline-adjusted ARD 6.3% (-2.8 to 15.4)<br>73.8% (141/191) vs. 68.4% (132/193)<br>ARD 5.4% (-3.6 to 14.5) | Low ¶                    | Remdesivir 5-day course may result in a moderate increase in percent recovered versus 10-day course; Range of ARDs 5.4% to 6.3%                                                                                 |
| <b>Clinical improvement, defined as a two-point reduction in patients' admission status on a 6-point ordinal scale (1= live discharge to 6=death), or live discharge from the hospital, whichever came first (2) as an improvement of at least 2 points from baseline on 7-point ordinal scale (1=death to 7=discharged from hospital) (3, 4)</b> |                                                                                                                                                                                      |                                                                                                                                                    |                          |                                                                                                                                                                                                                 |
| <b>Remdesivir 10-day course versus placebo (2) or standard of care</b><br>(4);<br>2 trials (n=629)                                                                                                                                                                                                                                                | Wang 2020 (2); 28 days<br>Severe - No O <sub>2</sub> 1%<br><br>Spinner (GS-US-540-5774: SIMPLE-2) 2020 (4); 28 days<br>Moderate - No O <sub>2</sub> 84%                              | 65.2% (103/158) vs. 57.7% (45/78)<br>ARD 7.5% (-5.7 to 20.7)<br>90.2% (174/193) vs. 83% (166/200)<br>ARD 7.2% (0.5 to 13.8)                        | Low §                    | Remdesivir 10-day course may result in a moderate increase in clinical improvement versus placebo or standard care<br>Range of ARDs 7.2% to 7.5%                                                                |

| Comparison(s);<br>Number of trials<br>(number<br>evaluated)                         | Study, Year<br>(reference);<br>Assessment<br>timepoint;<br>Disease severity,<br>based on oxygen (O <sub>2</sub> )<br>status at admission                                                                                                                                                         | Absolute effect of Remdesivir<br>versus Control (95% CI)                                                                                                               | Certainty<br>of Evidence | Summary                                                                                                                              |
|-------------------------------------------------------------------------------------|--------------------------------------------------------------------------------------------------------------------------------------------------------------------------------------------------------------------------------------------------------------------------------------------------|------------------------------------------------------------------------------------------------------------------------------------------------------------------------|--------------------------|--------------------------------------------------------------------------------------------------------------------------------------|
| <b>Remdesivir 5-day course versus standard of care;</b><br>1 trial (n=391)          | Spinner (GS-US-540-5774: SIMPLE-2) 2020 (4); 28 days<br>Moderate - No O <sub>2</sub> 82%                                                                                                                                                                                                         | 89.5% (171/191) vs. 83% (166/200)<br>ARD 6.5% (-0.3 to 13.3)                                                                                                           | Low §                    | Remdesivir 5-day course may result in a moderate increase in clinical improvement versus standard care                               |
| <b>Remdesivir 5-day course versus Remdesivir 10-day course;</b><br>2 trials (n=781) | Goldman (GS-US-540-5773: SIMPLE-1) 2020 (3); 14 days<br>Severe - No O <sub>2</sub> 14%<br>Spinner (GS-US-540-5774: SIMPLE-2) 2020 (4); 11 days<br>Moderate - No O <sub>2</sub> 86%                                                                                                               | 64.5% (129/200) vs. 54.3% (107/197)<br>Baseline-adjusted ARD 6.5% (-2.8 to 15.7)<br>70.2% (134/191) vs. 65.3% (126/193)<br>ARD 4.9% (-4.5 to 14.2)                     | Low ¶                    | Remdesivir 5-day course may result in a moderate increase in clinical improvement versus 10-day course<br>Range of ARDs 4.9% to 6.5% |
| <b>Hospital Length of Stay (LOS), Days (Median IQR)</b>                             |                                                                                                                                                                                                                                                                                                  |                                                                                                                                                                        |                          |                                                                                                                                      |
| <b>Remdesivir 10-day course versus placebo;</b><br>2 trials (n=1299)                | Beigel (ACTT-1) 2020 (1); 29 days<br>Severe - No O <sub>2</sub> 13%<br><br>Wang 2020 (2); 28 days<br>Severe - No O <sub>2</sub> 1%                                                                                                                                                               | <i>Initial hospitalization</i><br>12 (6 to 28) vs. 17 (8 to 28)<br>MD -5 days [95% CI, -7.7 to -2.3]<br><br>25 (16 to 38) vs. 24 (18 to 36)<br>MD 0 days (-4.0 to 4.0) | Low **                   | Remdesivir 10-day course may result in a moderate reduction in median length of hospital stay versus placebo                         |
| <b>Remdesivir 10-day course versus standard of care</b>                             | Hospital LOS: NR<br>Solidarity (5), Severe - No O <sub>2</sub> 24%; No differences in percent hospitalized at 7 (69% vs. 59%) and 14 days (22% vs. 19%)<br>SIMPLE-2 (4), Moderate - No O <sub>2</sub> 84%; No differences in percent hospitalized at 11 (34% vs. 38%) and 14 days (23% vs. 31%). |                                                                                                                                                                        |                          |                                                                                                                                      |
| <b>Remdesivir 5-day course versus standard of care</b>                              | Hospital LOS: NR<br>SIMPLE-2 (4), Moderate - No O <sub>2</sub> 82%; No differences in percent hospitalized at 11 (30% vs. 38%) and 14 days (23% vs. 31%),                                                                                                                                        |                                                                                                                                                                        |                          |                                                                                                                                      |

| Comparison(s);<br>Number of trials<br>(number<br>evaluated)                                        | Study, Year<br>(reference);<br>Assessment<br>timepoint;<br>Disease severity,<br>based on oxygen (O <sub>2</sub> )<br>status at admission                                                       | Absolute effect of Remdesivir<br>versus Control (95% CI)                                                                                                     | Certainty<br>of Evidence | Summary                                                                                                                                                                                                                                                                                                             |
|----------------------------------------------------------------------------------------------------|------------------------------------------------------------------------------------------------------------------------------------------------------------------------------------------------|--------------------------------------------------------------------------------------------------------------------------------------------------------------|--------------------------|---------------------------------------------------------------------------------------------------------------------------------------------------------------------------------------------------------------------------------------------------------------------------------------------------------------------|
| <b>Remdesivir 5-day course versus Remdesivir 10-day course</b>                                     | Hospital LOS: NR<br>SIMPLE-2 (4), Moderate - No O <sub>2</sub> 86%:<br>vs. 23%)                                                                                                                | No differences in percent hospitalized at 11 (30% vs. 34%) and 14 days (23% vs. 23%)                                                                         |                          |                                                                                                                                                                                                                                                                                                                     |
| <b>Time to Recovery or Time to Clinical Improvement, Days, Median (IQR)</b>                        |                                                                                                                                                                                                |                                                                                                                                                              |                          |                                                                                                                                                                                                                                                                                                                     |
| <b>Remdesivir 10-day course versus placebo or standard of care;</b><br>3 trials (n=1674) (1, 2, 4) | 11-29 days<br><br>Any severity - No O <sub>2</sub> 28%;<br>Any O <sub>2</sub> /Ventilation 72%                                                                                                 | Difference in medians ranged from -1 to 5 days)                                                                                                              | Low ††                   | Remdesivir 10-day course may result in an uncertain reduction in time to recovery in patients with moderate severity at day 11 and up to a large reduction in patients with severe disease at day 29 and a moderate reduction in median time to clinical improvement in patients with severe disease versus control |
| <b>Remdesivir 10-day course versus placebo;</b><br>2 trials (n=1299)                               | Beigel (ACTT-1) 2020 (1); 29 days<br>Severe - No O <sub>2</sub> 13%<br><i>Recovery</i><br>Wang 2020 (2)<br><br>28 days<br><br>Severe - No O <sub>2</sub> 1%<br><br><i>Clinical Improvement</i> | 10 (95% CI 9 to 11) vs. 15 (95% CI 13 to 18); P<.001<br>Rate ratio 1.29 (1.12 to 1.49)<br><br>21 (13 to 28) vs. 23 (18 to 36);<br><br>HR 1.23 (0.87 to 1.75) | Low ††                   | Remdesivir 10-day course may result in large reduction in median time to recovery and a moderate reduction in median time to clinical improvement versus placebo<br><i>(time to recovery did not vary by age, sex, symptom duration (≤10 days vs &gt;10 days) or disease severity) (1)</i>                          |



| Comparison(s);<br>Number of trials<br>(number<br>evaluated)                                                          | Study, Year<br>(reference);<br>Assessment<br>timepoint;<br>Disease severity,<br>based on oxygen (O <sub>2</sub> )<br>status at admission                                                                                 | Absolute effect of Remdesivir<br>versus Control (95% CI)                                                                                                                         | Certainty<br>of Evidence | Summary                                                                                                 |
|----------------------------------------------------------------------------------------------------------------------|--------------------------------------------------------------------------------------------------------------------------------------------------------------------------------------------------------------------------|----------------------------------------------------------------------------------------------------------------------------------------------------------------------------------|--------------------------|---------------------------------------------------------------------------------------------------------|
| <b>Remdesivir 10-day course versus standard of care;</b><br>1 trial (n=393)                                          | Spinner (GS-US-540-5774: SIMPLE-2) 2020 (4); 11 days<br>Moderate - No O <sub>2</sub> 84%<br><i>Recovery</i>                                                                                                              | 8 (4 to 13) vs. 7 (4 to 15); HR 1.11 (0.90 to 1.37)                                                                                                                              | Insufficient ‡‡          |                                                                                                         |
| <b>Remdesivir 5-day course versus standard of care;</b><br>2 trials (n=461)                                          | Spinner (GS-US-540-5774: SIMPLE-2) 2020 (4); 11 days<br>Moderate - No O <sub>2</sub> 82%<br><i>Recovery</i><br>Mahajan 2021 (7); Day 10 through Day 20<br>Severe - No O <sub>2</sub> 0%<br><i>Recovery</i>               | 6 (5 to 10) vs. 7 (4 to 15); HR 1.18 (0.96 to 1.45)<br><br>Data NR Trialists noted patients in both groups “had an equal time to recovery (not defined) between 10 and 20 days.” | Low                      | Remdesivir 5-day course may result in a small reduction in median time to recovery versus standard care |
| <b>Remdesivir 5-day course versus Remdesivir 10-day course;</b><br>2 trials (n=781)                                  | Goldman (GS-US-540-5773: SIMPLE-1) 2020 (3); 14 days<br>Severe - No O <sub>2</sub> 14%<br><i>Recovery</i><br>Spinner (GS-US-540-5774: SIMPLE-2) 2020 (4); 11 days<br>Moderate - No O <sub>2</sub> 86%<br><i>Recovery</i> | 10 (6 to 18) vs. 11 (7 to not able to estimate); P NS<br>HR 0.81 (0.64 to 1.04)<br><br>6 (5 to 10) vs. 8 (4 to 13); HR NR                                                        | Low ¶                    | Remdesivir 5-day course may result in a small reduction in median time to recovery versus 10-day course |
| <b>Proportion on invasive ventilation/ECMO at follow up (Spinner on day 11, Wang on day 14 and ACTT-1 on day 15)</b> |                                                                                                                                                                                                                          |                                                                                                                                                                                  |                          |                                                                                                         |

| Comparison(s);<br>Number of trials<br>(number<br>evaluated)                                        | Study, Year<br>(reference);<br>Assessment<br>timepoint;<br>Disease severity,<br>based on oxygen (O <sub>2</sub> )<br>status at admission | Absolute effect of Remdesivir<br>versus Control (95% CI)                                                                       | Certainty<br>of Evidence | Summary                                                                                                                                                               |
|----------------------------------------------------------------------------------------------------|------------------------------------------------------------------------------------------------------------------------------------------|--------------------------------------------------------------------------------------------------------------------------------|--------------------------|-----------------------------------------------------------------------------------------------------------------------------------------------------------------------|
| <b>Remdesivir 10-day course versus placebo or standard of care;</b><br>3 trials (n=1686) (1, 2, 4) | 11-15 days<br>Any severity - No O <sub>2</sub> 28%; Any O <sub>2</sub> /Ventilation 72%                                                  | 11.3% (100/887) vs. 16.5% (132/799)<br>Pooled ARD -4.8% (-8.0 to -1.5)                                                         | Low §                    | Remdesivir 10-day course may result in a small reduction in proportion on invasive ventilation or ECMO at follow-up versus placebo or standard care                   |
| <b>Remdesivir 10-day course versus placebo;</b><br>2 trials (n=1299)                               | Beigel (ACTT-1) 2020 (1)<br>Severe - No O <sub>2</sub> 13%<br><br>Wang 2020 (2)<br>Severe - No O <sub>2</sub> 1%                         | 17.6% (95/541) vs. 23.2% (121/521)<br>ARD -5.7% (-10.5 to -0.8)<br><br>2.6% (4/153) vs. 9.0% (7/78)<br>ARD -6.4 (-13.2 to 0.5) | Low §                    | Remdesivir 10-day course may result in a moderate reduction in proportion on invasive ventilation or ECMO at follow-up versus placebo<br>Range of ARDs -5.7% to -6.4% |
| <b>Remdesivir 10-day course versus standard of care;</b><br>1 trial (n=393)                        | Spinner (GS-US-540-5774: SIMPLE-2) 2020 (4)<br>Moderate - No O <sub>2</sub> 84%                                                          | 0.5% (1/193) vs. 2.0% (4/200)<br>ARD -1.5% (-3.7 to 0.7)                                                                       | Low §                    | Remdesivir 10-day course may result in a small reduction in proportion on invasive ventilation or ECMO at follow-up versus standard care                              |
| <b>Remdesivir 5-day course versus standard of care;</b><br>1 trial (n=391)                         | Spinner (GS-US-540-5774: SIMPLE-2) 2020 (4)<br>Moderate - No O <sub>2</sub> 82%                                                          | 0% (0/191) vs. 2.0% (4/200)<br>ARD -2.0% (-4.2 to 0.2)                                                                         | Low §                    | Remdesivir 5-day course may result in a small reduction in proportion on invasive ventilation or ECMO at follow-up versus standard care                               |
| <b>Remdesivir 5-day course versus Remdesivir 10-day course;</b>                                    | Goldman (GS-US-540-5773: SIMPLE-1) 2020 (3)<br>Severe - No O <sub>2</sub> 14%                                                            | 8.0% (16/200) vs. 16.8% (33/197)<br>ARD -8.8% (-15.2 to -2.3)                                                                  | Low §§                   | Remdesivir 5-day course may result in a small reduction in proportion on                                                                                              |

| Comparison(s);<br>Number of trials<br>(number<br>evaluated)                                                                | Study, Year<br>(reference);<br>Assessment<br>timepoint;<br>Disease severity,<br>based on oxygen (O <sub>2</sub> )<br>status at admission | Absolute effect of Remdesivir<br>versus Control (95% CI)             | Certainty<br>of Evidence | Summary                                                                                                                                                                                                                                                                                  |
|----------------------------------------------------------------------------------------------------------------------------|------------------------------------------------------------------------------------------------------------------------------------------|----------------------------------------------------------------------|--------------------------|------------------------------------------------------------------------------------------------------------------------------------------------------------------------------------------------------------------------------------------------------------------------------------------|
| 2 trials (n=781)                                                                                                           | Spinner (GS-US-540-5774: SIMPLE-2) 2020 (4)<br>Moderate - No O <sub>2</sub> 86%                                                          | 0% (0/191) vs. 0.5% (1/193)<br>ARD -0.5% (-1.9 to 0.9)               |                          | invasive I ventilation or ECMO versus 10-day course at follow-up<br>Range of ARDs -8.8% to -0.5%<br>( <i>Observed effects may vary based on the baseline disease severity of the enrolled patients in each trial, i.e. severe disease in SIMPLE-1 and moderate disease in SIMPLE-2</i> ) |
| <b>Subsequent need for ventilation (invasive or non-invasive ventilation, or ECMO) in those not ventilated at baseline</b> |                                                                                                                                          |                                                                      |                          |                                                                                                                                                                                                                                                                                          |
| <b>Remdesivir 10-day course versus standard of care;</b><br>1 trial (n=4964) (5)                                           | Follow-up through day 28<br>Severe - No O <sub>2</sub> 24%                                                                               | 11.9% (295/2489) vs. 11.5% (284/2475)<br>ARD 0.4% (-1.4 to 2.2)      | Moderate ‡               | Remdesivir 10-day course probably results in little to no difference in new need for ventilation versus standard care                                                                                                                                                                    |
| <b>Remdesivir 5-day course versus standard of care;</b><br>1 trial (n=70) (7)                                              | Day 12 through Day 24<br>Severe - No O <sub>2</sub> 0%                                                                                   | 11.8% (4/34) vs. 5.6% (2/36)<br>ARD 6.2% (-7.0 to 19.4)              | Insufficient III         |                                                                                                                                                                                                                                                                                          |
| <b>Any Adverse Event (includes markers of COVID-19 progression and remdesivir toxicity)</b>                                |                                                                                                                                          |                                                                      |                          |                                                                                                                                                                                                                                                                                          |
| <b>Remdesivir 10-day course versus placebo or standard of care;</b><br>3 trials (n=1674) (1, 2, 4)                         | 11-29 days<br>Any severity - No O <sub>2</sub> 28%; Any O <sub>2</sub> /Ventilation 72%                                                  | 59.1% (520/880) vs. 58.7% (466/794)<br>Pooled ARD -0.3 (-5.0 to 4.4) | Low §§                   | Remdesivir 10-day course may result in little to no difference in any adverse events versus control                                                                                                                                                                                      |
| <b>Remdesivir 10-day course versus placebo;</b>                                                                            | Beigel (ACTT-1) 2020 (1); 29 days<br>Severe - No O <sub>2</sub> 13%                                                                      | 57.3% (305/532) vs. 62.6% (323/516)<br>ARD -5.3% (-11.2 to 0.7)      | Low §                    | Remdesivir 10-day course may result in a small reduction in any adverse events versus placebo                                                                                                                                                                                            |

| Comparison(s);<br>Number of trials<br>(number<br>evaluated)                                                       | Study, Year<br>(reference);<br>Assessment<br>timepoint;<br>Disease severity,<br>based on oxygen (O <sub>2</sub> )<br>status at admission                                                         | Absolute effect of Remdesivir<br>versus Control (95% CI)                                                                                | Certainty<br>of Evidence | Summary                                                                                                                                        |
|-------------------------------------------------------------------------------------------------------------------|--------------------------------------------------------------------------------------------------------------------------------------------------------------------------------------------------|-----------------------------------------------------------------------------------------------------------------------------------------|--------------------------|------------------------------------------------------------------------------------------------------------------------------------------------|
| 2 trials (n=1281)                                                                                                 | Wang 2020 (2); 28 days<br>Severe - No O <sub>2</sub> 1%                                                                                                                                          | 65.8% (102/155) vs. 64.1%<br>(50/78)<br>ARD 1.7 (-11.3 to 14.7)                                                                         |                          | Range of ARDs -5.3% to 1.7%                                                                                                                    |
| <b>Remdesivir 10-day<br/>course versus<br/>standard of care;</b><br>1 trial (n=393)                               | Spinner (GS-US-540-<br>5774: SIMPLE-2) 2020<br>(4); 11 days<br>Moderate - No O <sub>2</sub> 84%                                                                                                  | 58.5% (113/193) vs. 47%<br>(93/200)<br>ARD 12.0% (2.2 to 21.9)                                                                          | Low §                    | Remdesivir 10-day course may<br>result in a moderate increase in any<br>adverse events versus standard of<br>care                              |
| <b>Remdesivir 5-day<br/>course versus<br/>standard of care;</b><br>1 trial (n=391)                                | Spinner (GS-US-540-<br>5774: SIMPLE-2) 2020<br>(4); 11 days<br>Moderate - No O <sub>2</sub> 82%                                                                                                  | 51.3% (98/191) vs. 46.5%<br>(93/200)<br>ARD 4.8% (-5.1 to 14.7)                                                                         | Low §                    | Remdesivir 5-day course may result<br>in a small increase in any adverse<br>events versus standard care                                        |
| <b>Remdesivir 5-day<br/>course versus<br/>Remdesivir 10-day<br/>course;</b><br>2 trials (n=781)                   | Goldman (GS-US-540-<br>5773: SIMPLE-1) 2020<br>(3); 14 days<br>Severe - No O <sub>2</sub> 14%<br>Spinner (GS-US-540-<br>5774: SIMPLE-2) 2020<br>(4); 11 days<br>Moderate - No O <sub>2</sub> 86% | 70.5% (141/200) vs. 73.6%<br>(145/197)<br>ARD -3.1% (-11.9 to 5.7)<br>51.3% (98/191) vs. 58.5%<br>(113/193)<br>ARD -7.2% (-17.2 to 2.7) | Low ¶                    | Remdesivir 5-day course may result<br>in a moderate reduction in any<br>adverse events versus 10-day<br>course<br>Range of ARDs -7.2% to -3.1% |
| <b>Serious Adverse Events (includes markers of COVID-19 progression and remdesivir toxicity)</b>                  |                                                                                                                                                                                                  |                                                                                                                                         |                          |                                                                                                                                                |
| <b>Remdesivir 10-day<br/>course versus<br/>placebo or<br/>standard of care;</b><br>3 trials (n=1674) (1,<br>2, 4) | 11-29 days<br>Any severity - No O <sub>2</sub><br>28%, Any O <sub>2</sub> /Ventilation<br>72%                                                                                                    | 19.2% (169/880) vs. 25.3%<br>(201/794)<br>Pooled ARD -6.3% (-10.2 to -<br>2.4)                                                          | Moderate ‡               | Remdesivir 10-day course probably<br>results in a moderate reduction in<br>serious adverse events versus<br>control                            |

| Comparison(s);<br>Number of trials<br>(number<br>evaluated)                         | Study, Year<br>(reference);<br>Assessment<br>timepoint;<br>Disease severity,<br>based on oxygen (O <sub>2</sub> )<br>status at admission | Absolute effect of Remdesivir<br>versus Control (95% CI)         | Certainty<br>of Evidence | Summary                                                                                                                                                                                                                                                                                                                          |
|-------------------------------------------------------------------------------------|------------------------------------------------------------------------------------------------------------------------------------------|------------------------------------------------------------------|--------------------------|----------------------------------------------------------------------------------------------------------------------------------------------------------------------------------------------------------------------------------------------------------------------------------------------------------------------------------|
| <b>Remdesivir 10-day course versus placebo;</b><br>2 trials (n=1299)                | Beigel (ACTT-1) 2020 (1); 29 days<br>Severe - No O <sub>2</sub> 13%                                                                      | 24.6% (131/532) vs. 31.6% (163/516)<br>ARD -7.0% (-12.4 to -1.5) | Moderate ‡               | Remdesivir 10-day course probably results in a moderate reduction in serious adverse events versus placebo<br>Range of ARDs -7.6% to -7.0%                                                                                                                                                                                       |
|                                                                                     | Wang 2020 (2); 28 days<br>Severe - No O <sub>2</sub> 1%                                                                                  | 18.1% (28/155) vs. 25.6% (20/78)<br>ARD -7.6 (-19.0 to 3.9)]     |                          |                                                                                                                                                                                                                                                                                                                                  |
| <b>Remdesivir 10-day course versus standard of care;</b><br>1 trial (n=393)         | Spinner (GS-US-540-5774: SIMPLE-2) 2020 (4); 11 days<br>Moderate - No O <sub>2</sub> 84%                                                 | 5.2% (10/193) vs. 9.0% (18/200)<br>ARD -3.8% (-8.9 to 1.2)       | Low §                    | Remdesivir 10-day course may result in a small reduction in serious adverse events versus standard care                                                                                                                                                                                                                          |
| <b>Remdesivir 5-day course versus standard of care;</b><br>1 trial (n=391)          | Spinner (GS-US-540-5774: SIMPLE-2) 2020 (4); 11 days<br>Moderate - No O <sub>2</sub> 82%                                                 | 4.7% (9/191) vs. 9.0% (18/200)<br>ARD -4.3% (-9.3 to 0.7)        | Low §                    | Remdesivir 5-day course may result in a small reduction in serious adverse events versus standard care                                                                                                                                                                                                                           |
| <b>Remdesivir 5-day course versus Remdesivir 10-day course;</b><br>2 trials (n=781) | Goldman (GS-US-540-5773: SIMPLE-1) 2020 (3); 14 days<br>Severe - No O <sub>2</sub> 14%                                                   | 21.0% (42/200) vs. 34.5% (68/197)<br>ARD -13.5% (-22.2 to -4.8)  | Low §§                   | Remdesivir 5-day course may result in a moderate reduction in serious adverse events versus 10-day course<br>Range of ARDs 13.5% to 0.5%<br>( <i>Observed effects may vary based on the baseline disease severity of the enrolled patients in each trial, i.e. severe disease in SIMPLE-1 and moderate disease in SIMPLE-2</i> ) |
|                                                                                     | Spinner (GS-US-540-5774: SIMPLE-2) 2020 (4); 11 days<br>Moderate - No O <sub>2</sub> 86%                                                 | 4.7% (9/191) vs. 5.2% (10/193)<br>ARD -0.5% (-4.8 to 3.9)        |                          |                                                                                                                                                                                                                                                                                                                                  |

**Abbreviations**

ARD = Absolute risk difference; CI = Confidence intervals; HR=Hazard ratio; IQR = inter quartile range; MD=Mean difference; NR= Not reported; NS = Not statistically significant; RCT = Randomized controlled trial

\* GRADE Working Group grades of evidence

High certainty: We are very confident that the true effect lies close to that of the estimate of the effect

Moderate certainty: We are moderately confident in the effect estimate: The true effect is likely to be close to the estimate of the effect, but there is a possibility that it is substantially different

Low certainty: Our confidence in the effect estimate is limited: The true effect may be substantially different from the estimate of the effect

Very low certainty: We have very little confidence in the effect estimate: The true effect is likely to be substantially different from the estimate of effect

Explanations for Certainty of Evidence assessment

**† Thresholds for determining magnitude by outcome are as follow:**

All-cause mortality: Little or No effect <1%; Small effect 1-2.9%; Moderate effect 3-4.9%; Large effect ≥5%

Recovery: Little or No effect <2%; Small effect 2-4.9%; Moderate effect 5-9.9%; Large effect ≥10%

Clinical Improvement: Little or No effect <2% Small effect 2-4.9%; Moderate effect 5-9.9%; Large effect ≥10%

Length of Stay: Little or No effect <1 day; Small effect ≥1-2 days; Moderate effect >2 to < 3 days; Large effect ≥3 days

Time to Recovery or Clinical Improvement: Little or No effect <1 day; Small effect ≥1-2 days; Moderate effect >2 to < 3 days; Large effect ≥3 days

Invasive ventilation or ECMO: Little or No effect <1%; Small effect 1-4.9%; Moderate effect 5-9.9%; Large effect ≥10%

Any adverse event: Little or No effect <2%; Small effect 2-4.9%; Moderate effect 5-19.9%; Large effect ≥20%

Severe adverse event: Little or No effect <1%; Small effect 1-4.9%; Moderate effect 5-9.9%; Large effect ≥10%

‡ Downgraded for imprecision

§ Downgraded two levels for imprecision (very wide CIs) and/or sparse data.

|| Downgraded two levels for imprecision (very wide CIs) and/or sparse data. The Mahajan trial (5), assessed as high risk of bias, did not impact the overall certainty of evidence or magnitude of effect

¶ Downgraded two levels for study limitations and imprecision (wide CIs)

\*\* Downgraded two levels for imprecision and inconsistency

†† Downgraded two levels for difficulty in interpreting precision and inconsistency.

‡‡ Downgraded to insufficient for difficulty in interpreting results (HR not reported for 5-day vs.10 day) and higher median with 10-day vs standard of care but reduction in time to recovery favors 10-day based on HR

§§ Downgraded two levels for imprecision and inconsistency

||| Downgraded to insufficient for study limitations and imprecision (very wide CIs)

**Supplement Table 4. Study Outcomes A**

| Author, Year (ref)        | Length of hospital stay                                |                                                        | Time to recovery                                                   |                                                                    | Mortality                                       |                             | Recovery or Combined endpoint "Clinical Improvement"              |                                                      |
|---------------------------|--------------------------------------------------------|--------------------------------------------------------|--------------------------------------------------------------------|--------------------------------------------------------------------|-------------------------------------------------|-----------------------------|-------------------------------------------------------------------|------------------------------------------------------|
|                           | Remdesivir                                             | Placebo                                                | Remdesivir                                                         | Placebo                                                            | Remdesivir                                      | Placebo                     | Remdesivir                                                        | Placebo                                              |
| Beigel 2020 (1)<br>ACTT-1 | Median [IQR]<br>12 [6 to 28]                           | Median [IQR]<br>17 [8 to 28]                           | Median [95% CI]<br>10 days [9 to 11]                               | Median [95% CI]<br>15 days [13 to 18]                              | 14-day<br>6.5%<br>(35/541)                      | 14-day<br>11.7%<br>(61/521) | Day 29<br>Recovery *<br>73.8%<br>(399/541)                        | Day 29<br>Recovery *<br>67.6% (352/521)              |
|                           | Difference<br>-5.0 days [95% CI, -7.7 to -2.3]         |                                                        |                                                                    |                                                                    | HR 0.55 [95% CI, 0.36 to 0.83] (through day 15) |                             | Recovery Rate Ratio 1.29 [95% CI, 1.12 to 1.49]                   |                                                      |
|                           | Median [IQR] for those who did not die<br>10 [5 to 21] | Median [IQR] for those who did not die<br>14 [7 to 27] |                                                                    |                                                                    | 29-day<br>10.9%<br>(59/541)                     | 29-day<br>14.8%<br>(77/521) | Recovery Mild/mod. Disease †<br>98.2% (54/55)                     | Recovery Mild/mod. Disease †<br>92.0% (46/50)        |
|                           | Difference<br>-4.0 days [95% CI, -6.0 to -2.0]         |                                                        |                                                                    |                                                                    | HR 0.73 [95% CI, 0.52 to 1.03]                  |                             | Severe Disease ‡<br>71.0% (345/486)                               | Severe Disease ‡<br>65.0% (306/471)                  |
| Wang 2020 (2)             | Median [IQR] 25 days<br>[16 to 38]                     | Median [IQR] 24 days<br>[18 to 36]                     | Time to Clinical Improvement<br>Median [IQR]<br>21 days [13 to 28] | Time to Clinical Improvement<br>Median [IQR] 23 days<br>[15 to 28] | 28-day<br>13.9%<br>(22/158)                     | 28-day<br>12.8%<br>(10/78)  | Day 28<br>Clinical improvement §<br>65.2% (103/158)               | Day 28<br>Clinical improvement §<br>57.7%<br>(45/78) |
|                           | Difference<br>0.0 days [95% CI, -4.0 to 4.0]           |                                                        |                                                                    |                                                                    | ARD 1.1% [95% CI, -8.1 to 10.3]                 |                             | ARD 7.5% [95% CI, -5.7 to 20.7]<br>HR 1.23 [95% CI, 0.87 to 1.75] |                                                      |
| Goldman 2020 (3)          | <b>Remdesivir 5-day</b>                                | <b>Remdesivir 10-day</b>                               | <b>Remdesivir 5-day</b>                                            | <b>Remdesivir 10-day</b>                                           | <b>Remdesivir 5-day</b>                         | <b>Remdesivir 10-day</b>    | <b>Remdesivir 5-day</b>                                           | <b>Remdesivir 10-day</b>                             |

|                                                                      |                   |                      |                                                                                  |                                                               |                                         |                              |                                                                                                                                                                                                                                                                                                             |                                                                                                                        |
|----------------------------------------------------------------------|-------------------|----------------------|----------------------------------------------------------------------------------|---------------------------------------------------------------|-----------------------------------------|------------------------------|-------------------------------------------------------------------------------------------------------------------------------------------------------------------------------------------------------------------------------------------------------------------------------------------------------------|------------------------------------------------------------------------------------------------------------------------|
| GS-US-540-5773<br>SIMPLE 1                                           | NR                | NR                   | Median [IQR]<br>10 days<br>[6 to 18]<br><br>HR 0.81<br>[95% CI, 0.64 to<br>1.04] | Median [IQR]<br>11 days<br>[7 to not possible<br>to estimate] | 14-day<br><br>8.0%<br>(16/200)<br>P=.70 | 14-day<br><br>10.7% (21/197) | Day 14<br>Clinical recovery<br>  <br>64.5% (129/200)<br>Baseline-<br>adjusted ARD<br>and p-value<br>-6.3%<br>[95% CI,<br>-15.4 to 2.8];<br>P=.17<br><br>Clinical<br>(≥2-point)<br>improvement ¶<br>64.5% (129/200)<br>Baseline-<br>adjusted ARD<br>and P-value<br>-6.5%<br>[95% CI, -15.7 to<br>2.8]; P=.16 | Day 14<br>Clinical recovery<br>  <br>53.8% (106/197)<br><br>Clinical<br>(≥2-point)<br>improvement ¶<br>54.3% (107/197) |
| Spinner 2020 (4)<br>GS-US-540-5774<br>SIMPLE 2 with<br>standard care | <b>Remdesivir</b> | <b>Standard Care</b> | <b>Remdesivir</b>                                                                | <b>Standard Care</b>                                          | <b>Remdesivir</b>                       | <b>Standard Care</b>         | <b>Remdesivir</b>                                                                                                                                                                                                                                                                                           | <b>Standard Care</b>                                                                                                   |



|                            | NR                                    | NR                                    | Median [IQR]<br>5 day<br>6 (5-10)<br><br>10 day<br>8 (4-13) | Median [IQR]<br>7 (4-14) | 11-day<br>5-day<br>0% (0/191)<br>10-day<br>1.0% (2/193)<br>HR for 5-day vs.<br>standard care<br>0.51 [95% CI,<br>0.09 to 2.80]<br>HR for 10-day<br>vs. standard care<br>0.76 [95% CI,<br>0.17 to 3.40] | 11-day<br>2.0% (4/200) | Day 11<br>Recovery II<br>5-day<br>73.8% (141/191)<br>10-day<br>68.4% (132/193)<br>HR for 5-day vs.<br>standard care<br>1.18 [95% CI,<br>0.96 to 1.45]<br>HR for 10-day<br>vs. standard care<br>1.11 [95% CI,<br>0.90 to 1.36]<br><br>Clinical<br>(≥2-point)<br>improvement ¶<br>5-day<br>70.2% (134/191)<br>10-day<br>65.3% (126/193)<br>HR for 5-day vs.<br>standard care<br>1.15 [95% CI,<br>0.93 to 1.42]<br>HR for 10-day<br>vs. standard care<br>1.16 [95% CI,<br>0.93 to 1.43] | Day 11<br>Recovery II<br>64.0% (128/200)<br><br>Clinical<br>(≥2-point)<br>improvement ¶<br>60.5% (121/200) |
|----------------------------|---------------------------------------|---------------------------------------|-------------------------------------------------------------|--------------------------|--------------------------------------------------------------------------------------------------------------------------------------------------------------------------------------------------------|------------------------|--------------------------------------------------------------------------------------------------------------------------------------------------------------------------------------------------------------------------------------------------------------------------------------------------------------------------------------------------------------------------------------------------------------------------------------------------------------------------------------|------------------------------------------------------------------------------------------------------------|
| WHO Solidarity<br>2020 (5) | Still hospitalized<br>at day 7<br>69% | Still hospitalized<br>at day 7<br>59% | NR                                                          | NR                       | 12.5%<br>(301/2743)<br><br>Rate Ratio: 0.95<br>[95% CI, 0.81 to<br>1.11]                                                                                                                               | 12.7%<br>(303/2708)    | NR                                                                                                                                                                                                                                                                                                                                                                                                                                                                                   | NR                                                                                                         |

|                                                                   |           |           |                                                                                                                                           |                                                                                  |                                                                                                                                                                                                                                                                                                                                                          |                                                                                         |           |           |
|-------------------------------------------------------------------|-----------|-----------|-------------------------------------------------------------------------------------------------------------------------------------------|----------------------------------------------------------------------------------|----------------------------------------------------------------------------------------------------------------------------------------------------------------------------------------------------------------------------------------------------------------------------------------------------------------------------------------------------------|-----------------------------------------------------------------------------------------|-----------|-----------|
| <b>NOR-Solidarity 2021 (6) **<br/>Sub-study of WHO Solidarity</b> | <b>NR</b> | <b>NR</b> | <b>NR</b>                                                                                                                                 | <b>NR</b>                                                                        | <b>In-hospital<br/>7.1%<br/>RR 1.0 [95% CI,<br/>0.2 to 4.6]<br/><br/>HR 1.0 [95% CI,<br/>0.4 to 2.9]<br/><br/>28 day<br/>2.4%<br/>Estimated<br/>Marginal Risk<br/>Difference vs.<br/>SC<br/>-2.9% [95% CI, -<br/>10.3 to 4.5]<br/><br/>60 day<br/>7.1%<br/>Estimated<br/>Marginal Risk<br/>Difference vs.<br/>SC<br/>1.9% [95% CI,<br/>-7.8 to 11.6]</b> | <b>In-hospital<br/>7.0%<br/><br/><br/>28 day<br/>5.3%<br/><br/><br/>60 day<br/>5.3%</b> | <b>NR</b> | <b>NR</b> |
| Mahajan 2021 (7)                                                  | NR        | NR        | Patients in the remdesivir group and standard of care group had an equal time to recovery between 10 and 20 days (no other data reported) | All patients<br>14.6% (6/41)<br><br>Per protocol<br>Day 12-24<br>14.7%<br>(5/34) | All patients<br>12.2% (5/41)<br><br>Per Protocol<br>Day 12-24<br>8.3%<br>(3/36)                                                                                                                                                                                                                                                                          | NR                                                                                      | NR        |           |

ARD = absolute risk difference; CI =confidence intervals; HR = Hazard ratio; IQR = interquartile range; NR = not reported; RR = relative risk; SC = standard care

\* Defined by either discharge from the hospital or hospitalization extended for purposes of infection-control only with no medical needs.

† Mild/moderate disease was defined by a SpO2 >94% and respiratory rate <24 breaths per minute without supplemental oxygen requirement.

‡ Severe disease was defined as participants meeting one or more of the following criteria: requiring invasive or non-invasive mechanical ventilation, requiring supplemental oxygen, an SpO2 ≤94% on room air, or respiratory rate ≥24 breaths per minute.

§ Defined as a two-point reduction in patients' admission status on a six-point ordinal scale, or live discharge from the hospital, whichever came first. The six-point scale was as follows: death=6; hospital admission for extracorporeal membrane oxygenation or mechanical ventilation=5; hospital admission for noninvasive ventilation or high-flow oxygen therapy=4; hospital admission for oxygen therapy (but not requiring high-flow or non-invasive ventilation)=3; hospital admission but not requiring oxygen therapy=2; and discharged or having reached discharge criteria (defined as clinical recovery—ie, normalization of pyrexia, respiratory rate <24 breaths per minute, saturation of peripheral oxygen >94% on room air, and relief of cough, all maintained for at least 72 h)=1 within 28 days after randomization

|| Patients achieved clinical recovery if they no longer required oxygen support and medical care or were discharged from the hospital (improvement from a baseline score of 2 to 5 to a score of 6 or 7).

¶ Clinical improvement was defined as an improvement of two or more points from baseline on a predefined seven-point scale consisting of the following categories: 1, death; 2, hospitalized, receiving invasive mechanical ventilation or ECMO; 3, hospitalized, receiving noninvasive ventilation or high-flow oxygen devices; 4, hospitalized, requiring

low-flow supplemental oxygen; 5, hospitalized, not requiring supplemental oxygen but receiving ongoing medical care (related or not related to Covid-19); 6, hospitalized, requiring neither supplemental oxygen nor ongoing medical care (other than that specified in the protocol for remdesivir administration); and 7, not hospitalized.

\*\* Indicates newly identified sub-study

**Supplement Table 5. Study Outcomes B**

| Author, Year (ref)                                                | Required invasive mechanical ventilation;<br>Duration of invasive mechanical ventilation, days                                                                                                                                                                                                           |                                                                                                                                                                                                   | Required oxygen;<br>Duration of oxygen support, days                                                                                                                                                                                                                                                     |                                                                                                                                                                                                  |
|-------------------------------------------------------------------|----------------------------------------------------------------------------------------------------------------------------------------------------------------------------------------------------------------------------------------------------------------------------------------------------------|---------------------------------------------------------------------------------------------------------------------------------------------------------------------------------------------------|----------------------------------------------------------------------------------------------------------------------------------------------------------------------------------------------------------------------------------------------------------------------------------------------------------|--------------------------------------------------------------------------------------------------------------------------------------------------------------------------------------------------|
|                                                                   | Remdesivir                                                                                                                                                                                                                                                                                               | Placebo                                                                                                                                                                                           | Remdesivir                                                                                                                                                                                                                                                                                               | Placebo                                                                                                                                                                                          |
| Beigel 2020 (1) ACTT-1                                            | 17.6% (95/541) at Day 15 visit;<br><br>Length of use if receiving at baseline,<br>Median [IQR]<br>17 days [9 to 28]<br>Difference<br>-3.0 days<br>[95% CI, -9.3 to 3.3]<br><br>Length of new use during study,<br>Median [IQR]<br>21.5 days [9 to 28]<br>Difference<br>1.0 days<br>[95% CI, -6.0 to 8.0] | 23.2% (121/521) at Day 15 visit;<br><br>Length of use if receiving at baseline,<br>Median [IQR]<br>20 days [8 to 28]<br><br>Length of new use during study,<br>Median [IQR]<br>23 days [12 to 28] | 10.7% (58/541) at Day 15 visit;<br><br>Length of use if receiving at baseline,<br>Median [IQR]<br>13 days [5 to 28]<br>Difference<br>-8.0 days<br>[95% CI, -11.8 to -4.2]<br><br>Length of new use during study,<br>Median [IQR]<br>4 days [2 to 12]<br>Difference<br>-1.0 days<br>[95% CI, -7.6 to 5.6] | 11.5% (60/521) at Day 15 visit;<br><br>Length of use if receiving at baseline,<br>Median [IQR]<br>21 days [8 to 28]<br><br>Length of new use during study,<br>Median [IQR]<br>5.5 days [1 to 15] |
| Wang 2020 (2)                                                     | 8.2% (13/158)<br>Median [IQR]<br>7.0 days<br>[4 to 16]<br>Difference<br>-4.0 days<br>[95% CI, -14.0 to 2.0]                                                                                                                                                                                              | 12.8% (10/78)<br>Median [IQR]<br>15.5 days<br>[6 to 21]                                                                                                                                           | Median [IQR]<br>19.0 days<br>[11 to 30]<br>Difference<br>-2.0 days<br>[95% CI, -6.0 to 1.0]                                                                                                                                                                                                              | Median [IQR]<br>21.0 days<br>[14 to 30.5]                                                                                                                                                        |
| Goldman 2020 (3)<br>GS-US-540-5773<br>SIMPLE 1                    | <b>Remdesivir<br/>5-day</b><br>8.0% (16/200); Duration NR                                                                                                                                                                                                                                                | <b>Remdesivir<br/>10-day</b><br>16.8% (33/197); Duration NR                                                                                                                                       | <b>Remdesivir<br/>5-day</b><br>NR                                                                                                                                                                                                                                                                        | <b>Remdesivir<br/>10-day</b><br>NR                                                                                                                                                               |
| Spinner 2020 (4)<br>GS-US-540-5774<br>SIMPLE 2 with standard care | <b>Remdesivir</b><br>5-day<br>0% (0/191)<br><br>10-day                                                                                                                                                                                                                                                   | <b>Standard Care</b><br>2.0% (4/200)                                                                                                                                                              | <b>Remdesivir</b><br>Time to Room Air<br>Median [IQR]<br>5-day<br>5 (3-7)                                                                                                                                                                                                                                | <b>Standard Care</b><br>6 (4-14)                                                                                                                                                                 |

|                                                   |                                                                                             |                                                              |                                                                        |                                                          |
|---------------------------------------------------|---------------------------------------------------------------------------------------------|--------------------------------------------------------------|------------------------------------------------------------------------|----------------------------------------------------------|
|                                                   | 0.5% (1/193)                                                                                |                                                              | 10-day<br>4 (2-6)                                                      |                                                          |
|                                                   |                                                                                             |                                                              | 6.3% (12/191) and 6.7%<br>(13/193) required oxygen<br>support on Day 1 | 11% (22/200) required<br>oxygen support on Day 1         |
| WHO Solidarity 2020 (5)                           | <b>Remdesivir</b>                                                                           | <b>Standard Care</b>                                         | <b>Remdesivir</b>                                                      | <b>Standard Care</b>                                     |
|                                                   | Initiation of ventilation in those<br>not already ventilated                                | Initiation of ventilation in those<br>not already ventilated | NR                                                                     | NR                                                       |
|                                                   | 11.9% (295/2489)                                                                            | 11.5% (284/2475)                                             |                                                                        |                                                          |
| <b><i>NOR-Solidarity 2021 (6)</i></b><br><b>*</b> | <b>9.5%</b>                                                                                 | <b>7.0%</b>                                                  | <b>NR</b>                                                              | <b>NR</b>                                                |
| <b><i>Sub-study of WHO<br/>Solidarity</i></b>     | <b><i>Estimated Marginal Risk<br/>Difference vs. SC<br/>2.5% [95% CI, -8.6 to 13.6]</i></b> |                                                              |                                                                        |                                                          |
| Mahajan 2021 (7)                                  | Day 12-24                                                                                   | Day 12-24                                                    | Day 12-24                                                              | Day 12-24                                                |
|                                                   | 11.8%                                                                                       | 5.6%                                                         | Supplemental O <sub>2</sub>                                            | Supplemental O <sub>2</sub>                              |
|                                                   | (4/34)                                                                                      | (2/36)                                                       | 11.8%                                                                  | 16.7%                                                    |
|                                                   |                                                                                             |                                                              | (4/34)                                                                 | (6/36)                                                   |
|                                                   |                                                                                             |                                                              | Day 12-24                                                              | Day 12-24                                                |
|                                                   |                                                                                             |                                                              | High-flow O <sub>2</sub> or/<br>non-invasive ventilation               | High-flow O <sub>2</sub> or/<br>non-invasive ventilation |
|                                                   |                                                                                             |                                                              | 55.9%                                                                  | 61.1%                                                    |
|                                                   |                                                                                             |                                                              | (19/34)                                                                | (22/36)                                                  |

ECMO = extracorporeal membrane oxygenation; IQR = interquartile range; NR = not reported; SC = standard care

\* Indicates newly identified sub-study

**Supplement Table 6. Viral Load**

| Author, Year (ref)<br>Viral load definition                                                     | Pre                                                                         |                                                                             | Post                                                                                                                                                        |                                                                |
|-------------------------------------------------------------------------------------------------|-----------------------------------------------------------------------------|-----------------------------------------------------------------------------|-------------------------------------------------------------------------------------------------------------------------------------------------------------|----------------------------------------------------------------|
|                                                                                                 | Remdesivir                                                                  | Placebo                                                                     | Remdesivir                                                                                                                                                  | Placebo                                                        |
| Beigel 2020 (1)<br>ACTT-1                                                                       | NR                                                                          | NR                                                                          | NR                                                                                                                                                          | NR                                                             |
| Wang 2020 (2)<br><i>Mean baseline viral load of nasopharyngeal and oropharyngeal swabs</i>      | 4.7 log <sub>10</sub> copies/mL                                             | 4.7 log <sub>10</sub> copies per mL                                         | NR                                                                                                                                                          | NR                                                             |
| <i>Upper respiratory tract specimens</i>                                                        | <i>Estimated from graph</i><br>3.7 log <sub>10</sub> copies/mL              | <i>Estimated from graph</i><br>3.6 log <sub>10</sub> copies/mL              | <i>Estimated from graph</i><br>0.6 log <sub>10</sub> copies/mL                                                                                              | <i>Estimated from graph</i><br>0.1 log <sub>10</sub> copies/mL |
| <i>Lower respiratory tract specimens</i>                                                        | <i>Estimated from graph</i><br>7.3 log <sub>10</sub> copies/mL              | <i>Estimated from graph</i><br>6.4 log <sub>10</sub> copies/mL              | <i>Estimated from graph</i><br>1.4 log <sub>10</sub> copies/mL                                                                                              | <i>Estimated from graph</i><br>0.0 log <sub>10</sub> copies/mL |
| Goldman 2020 (3)<br>GS-US-540-5773<br>SIMPLE 1                                                  | <b>Remdesivir 5-day</b><br>NR                                               | <b>Remdesivir 10-day</b><br>NR                                              | <b>Remdesivir 5-day</b><br>NR                                                                                                                               | <b>Remdesivir 10-day</b><br>NR                                 |
| Spinner 2020 (4)<br>GS-US-540-5774<br>SIMPLE 2 with standard care                               | <b>Remdesivir</b><br>NR                                                     | <b>Standard Care</b><br>NR                                                  | <b>Remdesivir</b><br>NR                                                                                                                                     | <b>Standard Care</b><br>NR                                     |
| WHO Solidarity 2020 (5)                                                                         | <b>Remdesivir</b><br>NR                                                     | <b>Standard Care</b><br>NR                                                  | <b>Remdesivir</b><br>NR                                                                                                                                     | <b>Standard Care</b><br>NR                                     |
| <b><i>NOR-Solidarity 2021 (6) *</i></b><br><b><i>Sub-study of WHO Solidarity oropharynx</i></b> | <b><i>1.6 (1.6)</i></b><br><b><i>log<sub>10</sub> copies/1000 cells</i></b> | <b><i>2.3 (1.8)</i></b><br><b><i>log<sub>10</sub> copies/1000 cells</i></b> | <b><i>Difference in viral level at day 10,</i></b><br><b><i>0.203 log<sub>10</sub> copies/1000 cells</i></b><br><b><i>[95% CI, -0.348 to 0.754]</i></b>     |                                                                |
|                                                                                                 |                                                                             |                                                                             | <b><i>Difference in daily viral decrease rate,</i></b><br><b><i>0.113 log<sub>10</sub> copies/1000 cells</i></b><br><b><i>[95% CI, -0.001 to 0.227]</i></b> |                                                                |
| Mahajan 2021 (7)                                                                                | NR                                                                          | NR                                                                          | NR                                                                                                                                                          | NR                                                             |

NR = not reported

\* Indicates newly identified sub-study

**Supplement Table 7. Harms A (Number of Subjects Reporting at Least One Event)**

| Author, Year (ref)                                                   | Serious AE                        |                                    | AE leading to drug withdrawal     |                                    | Any AE                              |                                    |
|----------------------------------------------------------------------|-----------------------------------|------------------------------------|-----------------------------------|------------------------------------|-------------------------------------|------------------------------------|
|                                                                      | Remdesivir                        | Placebo                            | Remdesivir                        | Placebo                            | Remdesivir                          | Placebo                            |
| Beigel 2020 (1)<br>ACTT-1                                            | 24.6%<br>(131/532) *              | 31.6%<br>(163/516) *               | 10.7%<br>(57/532) *               | 14.9%<br>(77/516) *                | 57.3% (305/532) <sup>a</sup>        | 62.6% (323/516) <sup>a</sup>       |
|                                                                      | <i>Study-related</i><br>2 events  | <i>Study-related</i><br>3 events   |                                   |                                    |                                     |                                    |
|                                                                      | Grade 3 or 4<br>51.3% (273/532)   | Grade 3 or 4<br>57.2% (295/516)    |                                   |                                    |                                     |                                    |
| Wang 2020 (2)                                                        | 18.1%<br>(28/155)                 | 25.6%<br>(20/78)                   | 11.6%<br>(18/155)                 | 5.1%<br>(4/78)                     | 65.8%<br>(102/155)                  | 64.1%<br>(50/78)                   |
|                                                                      | Grade 3 or 4<br>5.8% (9/155)      | Grade 3 or 4<br>12.8% (10/78)      |                                   |                                    | Grade 3 or 4<br>8.4% (13/155)       | Grade 3 or 4<br>14.1% (11/78)      |
| Goldman 2020 (3)<br>GS-US-540-5773<br>SIMPLE 1                       | <b>Remdesivir</b><br><b>5-day</b> | <b>Remdesivir</b><br><b>10-day</b> | <b>Remdesivir</b><br><b>5-day</b> | <b>Remdesivir</b><br><b>10-day</b> | <b>Remdesivir</b><br><b>5-day</b>   | <b>Remdesivir</b><br><b>10-day</b> |
|                                                                      | 21.0% (42/200)                    | 34.5% (68/197)                     | 4.5%<br>(9/200)<br>P=.07          | 10.2%<br>(20/197)                  | 70.5%<br>(141/200)<br>P=.86         | 73.6%<br>(145/197)                 |
|                                                                      |                                   |                                    |                                   |                                    | Grade ≥3<br>30% (60/200)            | Grade ≥3<br>43% (85/197)           |
| Spinner 2020 (4)<br>GS-US-540-5774<br>SIMPLE 2 with<br>standard care | <b>Remdesivir</b>                 | <b>Standard Care</b>               | <b>Remdesivir</b>                 | <b>Standard Care</b>               | <b>Remdesivir</b>                   | <b>Standard Care</b>               |
|                                                                      | 5-day<br>4.7% (9/191)             | 9.0% (18/200)                      | 5-day<br>2.1% (4/191)             | NA                                 | 5-day<br>51.3% (98/191)             | 45.0% (90/200)                     |
|                                                                      | 10-day<br>5.2% (10/193)           |                                    | 10-day<br>4.1% (8/193)            |                                    | 10-day<br>58.5% (106/193)           |                                    |
|                                                                      |                                   |                                    |                                   |                                    | Grade ≥3<br>5-day<br>10.5% (20/191) | Grade ≥3<br>12.0% (24/200)         |
|                                                                      |                                   |                                    |                                   |                                    | 10-day                              |                                    |

|                                                                         |                                        |                             |                                                |                         |                             |                             |
|-------------------------------------------------------------------------|----------------------------------------|-----------------------------|------------------------------------------------|-------------------------|-----------------------------|-----------------------------|
|                                                                         |                                        |                             |                                                |                         | 10.9% (21/193)              |                             |
| WHO Solidarity 2020 (5)                                                 | <b>Remdesivir</b>                      | <b>Standard Care</b>        | <b>Remdesivir</b>                              | <b>Standard Care</b>    | <b>Remdesivir</b>           | <b>Standard Care</b>        |
|                                                                         | NR                                     | NR                          | NR                                             | NR                      | NR                          | NR                          |
| <b><i>NOR-Solidarity 2021 (6) ‡<br/>Sub-study of WHO Solidarity</i></b> | <b><i>19.0% (8/42)<br/>P=.56 †</i></b> | <b><i>14.9% (13/87)</i></b> | <b><i>0% (0/42)</i></b>                        | <b><i>0% (0/87)</i></b> | <b><i>38.5% (20/42)</i></b> | <b><i>25.3% (22/87)</i></b> |
| Mahajan 2021 (7)                                                        | NR                                     | NR                          | 7.3% (3/41) due to abnormal ALT and AST values | 0/41                    | NR                          | NR                          |

AE = adverse event; ALT = alanine aminotransferase; AST = aspartate aminotransferase; NR = not reported

\* Data for the treated population

† P-value calculated by review team

‡ Indicates newly identified sub-study



**Supplement Table 8. Risk of Bias of studies**

| <b>Author, Year (ref)</b>                      | <b>Random sequence generation</b>                    | <b>Allocation concealment</b> | <b>Blinding *</b>                                                                                         | <b>Incomplete outcome data †</b>                                                                                                                 | <b>Selective outcome reporting ‡</b> | <b>Overall Risk of Bias §</b>                                                                                                                                                                                         |
|------------------------------------------------|------------------------------------------------------|-------------------------------|-----------------------------------------------------------------------------------------------------------|--------------------------------------------------------------------------------------------------------------------------------------------------|--------------------------------------|-----------------------------------------------------------------------------------------------------------------------------------------------------------------------------------------------------------------------|
| Beigel 2020 (1)<br>ACTT-1                      | Low, adequate, permuted randomization sequence       | Low, adequate, web-based      | Low, patient, provider<br><br>Follow-up safety and efficacy evaluations performed by blinded clinic staff | Low, 1 placebo patient and 3 remdesivir patients excluded due to no data after baseline.                                                         | No                                   | Low                                                                                                                                                                                                                   |
| Wang 2020 (2)<br><br>Note: trial stopped early | Low, adequate, permuted block randomization sequence | Low, adequate, centralized    | Low, patient, provider                                                                                    | Low, 1 placebo patient withdrew consent, not in ITT analyses.<br>Three remdesivir patients did not take drug and are not in the safety analyses. | No                                   | Low                                                                                                                                                                                                                   |
| Goldman 2020 (3)<br>GS-US-540-5773<br>SIMPLE 1 | Low, adequate, computer generated                    | Low, adequate, web-based      | Open-label<br><br>Outcome assessors were not blinded.                                                     | Low, 2 patients in the 5-day group and 3 in the 10-day group not included in analyses (withdrawn or randomized in error)                         | No                                   | Moderate based on imbalance between groups (patients randomly assigned to the 10-day group had significantly worse clinical status than those assigned to the 5-day group (P = 0.02)) and open label nature of study. |
| Spinner 2020 (4)<br>GS-US-540-5774             | Low, adequate, computer generated                    | Low, adequate, web-based      | Open-label                                                                                                | Low, 8 patients in the 5-day group and 4 in the 10-day group not                                                                                 | No                                   | Low                                                                                                                                                                                                                   |

| Author, Year (ref)                                                    | Random sequence generation                                                                              | Allocation concealment                                                                                                                     | Blinding *                                              | Incomplete outcome data †                                                                                                                                                                                                                                      | Selective outcome reporting ‡                                                        | Overall Risk of Bias §                                                                                |
|-----------------------------------------------------------------------|---------------------------------------------------------------------------------------------------------|--------------------------------------------------------------------------------------------------------------------------------------------|---------------------------------------------------------|----------------------------------------------------------------------------------------------------------------------------------------------------------------------------------------------------------------------------------------------------------------|--------------------------------------------------------------------------------------|-------------------------------------------------------------------------------------------------------|
| SIMPLE 2 with standard care                                           |                                                                                                         |                                                                                                                                            | Outcome assessors were not blinded.                     | included in analyses (did not start treatment)                                                                                                                                                                                                                 |                                                                                      |                                                                                                       |
| WHO Solidarity 2020 (5)<br><b>(NOR-Solidarity – sub-study) (6) II</b> | WHO: Unclear, not reported;<br><br><b><i>NOR-Solidarity: Low, computer randomization procedures</i></b> | WHO: Low, adequate, cloud-based;<br><br><b><i>NOR-Solidarity: Low, allocation sequence was prepared by an independent statistician</i></b> | Open-label<br><br>Blinded analyses of all relevant data | WHO: Low, 7 patients in remdesivir and 17 patients in control group not included in analyses (no or uncertain consent to follow-up)<br><br><b><i>NOR-Solidarity: 2% patients not included in full analysis set, 18% did not complete 3-month follow-up</i></b> | WHO: Yes – limited reporting of hospitalization duration; no adverse event reporting | Moderate based on unclear sequence generation and selective outcomes reporting                        |
| Mahajan 2021 (7)                                                      | Low, adequate, computer generated                                                                       | Unclear, not reported                                                                                                                      | Open-label                                              | High, 8 patients in remdesivir and 5 patients in control group not included in analyses (Patients who were discharged when symptom-free, withdrawn from treatment, for had treatment stopped due to elevated ALT or AST levels were excluded). 16%             | No                                                                                   | High based on not using ITT analysis, attrition, and absence of information on allocation concealment |

| Author, Year (ref) | Random sequence generation | Allocation concealment | Blinding * | Incomplete outcome data †   | Selective outcome reporting ‡ | Overall Risk of Bias § |
|--------------------|----------------------------|------------------------|------------|-----------------------------|-------------------------------|------------------------|
|                    |                            |                        |            | were excluded from analyses |                               |                        |

ALT = alanine aminotransferase; AST = aspartate aminotransferase; ITT = intent-to-treat

\* For the open-label trial, blinding of study participants and study personnel was not feasible. This element was not considered in rating overall risk of bias.

† Incomplete outcome data was rated high if more than 10% of participants randomized were not included in the analyses.

‡ Selective reporting was determined by comparing reported outcomes with outcomes specified in the Methods section. If a protocol paper was available, reported outcomes were compared with outcomes specified in the protocol.

§ Studies were rated low risk of bias if at least 3 elements were rated low and no additional elements were rated high. Studies were rated High risk of bias if at least 2 elements were rated high risk of bias. All other studies were rated Moderate risk of bias.

|| Indicates newly identified sub-study.

## References

1. Beigel JH, Tomashek KM, Dodd LE, et al; ACTT-1 Study Group Members. Remdesivir for the treatment of Covid-19 - final report. *N Engl J Med.* 2020;383:1813-26. [PMID: 32445440] doi:10.1056/NEJMoa2007764
2. Wang Y, Zhang D, Du G, et al. Remdesivir in adults with severe COVID-19: a randomised, double-blind, placebo-controlled, multicentre trial. *Lancet.* 2020;395:1569-78. [PMID: 32423584] doi:10.1016/S0140-6736(20)31022-9
3. Goldman JD, Lye DCB, Hui DS, et al. Remdesivir for 5 or 10 days in patients with severe Covid-19. *N Engl J Med.* 2020;383:1827-37. [PMID: 32459919] doi:10.1056/NEJMoa2015301
4. Spinner CD, Gottlieb RL, Criner GJ, et al; GS-US-540-5774 Investigators. Effect of remdesivir vs standard care on clinical status at 11 days in patients with moderate COVID-19. A randomized clinical trial. *JAMA.* 2020;324:1048-57. [PMID:32821939] doi:10.1001/jama.2020.16349
5. Pan H, Peto R, Henao-Restrepo A, et al; WHO Solidarity Trial Consortium. Repurposed antiviral drugs for Covid-19 - interim WHO Solidarity Trial Results. *N Engl J Med.* 2021;384:497-511. [PMID: 33264556] doi: 10.1056/NEJMoa2023184.
6. Barratt-Due A, Olsen IC, Nezvalova-Henriksen K, et al. Evaluation of the Effects of Remdesivir and Hydroxychloroquine on Viral Clearance in COVID-19: A Randomized Trial. *Ann Int Med.* 2021. [PMID 34251903] doi: 10.7326/M21-0653.
7. Mahajan L, Singh AP. Clinical outcomes of using remdesivir in patients with moderate to severe COVID-19: A prospective randomised study. *Indian J Anaesth.* 2021;65:S41-S46. [PMID: 33814589] doi:10.4103/ija.IJA\_149\_21
